# Supplementary material for: New complexity for aromatic ring agostic interactions
Source: Royal Society of Chemistry journal article supplement (doi:10.1039/c7cc01167a), 2017-01-01
Supplement: c7cc01167a1.pdf [file c7cc01167a1.pdf]

## Supplementary Data for Communication

### Index

Supplementary Data 1: Computational details for complexes **(1)** to **(6)** and [PdCl(CH<sub>3</sub>)(1-tetralone oxime)].

Supplementary Data 2: Cartesian coordinates and energies for calculated structures **(1)** to **(6)** and [PdCl(CH<sub>3</sub>)(1-tetralone oxime)].

Supplementary Figure 1: Ball and stick diagrams showing the agostic C-H bond in relation to the Pd coordination plane for complexes **(1)** to **(5)**.

Supplementary Figure 2: NBO electron density and contour plots for the various interactions in complex **(1)**

Supplementary Figure 3: Optimised structure of complex with substituent N=NPO(OCH<sub>2</sub>CH<sub>3</sub>)<sub>2</sub>.

Supplementary Table 1: QTAIM aromatic ring C and H atomic charges for complexes **(1)** to **(5)** and [PdCl(CH<sub>3</sub>)(1-tetralone oxime)].

Supplementary Table 2: QTAIM properties of C-H bond critical points for complexes **(1)** to **(5)** charges for complexes **(1)** to **(5)** and [PdCl(CH<sub>3</sub>)(1-tetralone oxime)].

Supplementary Table 3: Second order perturbation energy E (2) (kcalmol<sup>-1</sup>) values for donor-acceptor NBOs interactions for complexes **(1)** to **(6)** and [PdCl(CH<sub>3</sub>)(1-tetralone oxime)].

Supplementary Table 4: Overlap matrix for complexes **(1)** to **(5)** ) and [PdCl(CH<sub>3</sub>)(1-tetralone oxime)].

Supplementary Table 5: Occupancy (n) and energies (a.u) of NBOs involved donor-acceptor interactions for complexes **(1)** to **(5)** and [PdCl(CH<sub>3</sub>)(1-tetralone oxime)].

Supplementary Table 6: Selected structural data for **(1)** to **(5)** and [PdCl(CH<sub>3</sub>)(1-tetralone oxime)].

Supplementary Table 7: NBO donations (kcal mol<sup>-1</sup>) for **(1)** to **(5)** and [PdCl(CH<sub>3</sub>)(1-tetralone oxime)].

**Supplementary Data 1:** Computational details for complexes **(1)** to **(6)** and [PdCl(CH<sub>3</sub>)(1-tetralone oxime)].

DFT PBE-D3<sup>1</sup> functional based geometry optimizations and vibrational calculations for the complexes **(1)**-**(6)** were performed using the Gaussian09 (G09)<sup>2</sup> software. A triple-zeta high quality basis set (aug-cc-pVTZ-PP)<sup>3</sup> was employed for Pd; aug-cc-pVTZ<sup>4</sup> for the attached ancillary ligands (Cl atoms), agostic hydrogen and nitrogen (attached to Pd) and double-zeta quality basis set (aug-cc-pVDZ)<sup>4</sup> was used for the remainder of atoms. All the structures were energy-minimised as no imaginary frequency was found in the vibrational analysis. For the QTAIM analysis, the input files (.wfx) were obtained from G09<sup>2</sup> and QTAIM calculations were performed with the AIMALL software<sup>5</sup>. The NBO calculations were performed with the NBO6.0 package<sup>6</sup> and NBOView2.0<sup>6</sup> was used to visualize the contours and surfaces of donor-acceptor interactions. The same procedure was used for the ligand calculations.

**Supplementary Data 2:** Cartesian coordinates and energies for calculated structures **(1)** to **(6)** and [PdCl(CH<sub>3</sub>)(1-tetralone oxime)].

**Complex (1):** (E = -1564.79211120 a.u)

|     |             |             |             |
|-----|-------------|-------------|-------------|
| O 1 |             |             |             |
| Pd  | 1.33110500  | 0.05038900  | -0.09868200 |
| Cl  | 2.95379500  | -1.43745800 | 0.54319000  |
| Cl  | 2.71227200  | 1.85393100  | -0.11694400 |
| C   | -1.28543400 | -1.19282400 | -0.21582800 |
| C   | -2.35744000 | -2.24306700 | -0.17071000 |
| C   | -3.74675000 | -1.62350800 | -0.38995400 |
| H   | -2.29873400 | -2.75054100 | 0.81548500  |
| H   | -2.13424100 | -3.02656200 | -0.91910900 |
| C   | -3.95155400 | -0.38031400 | 0.49054600  |
| H   | -4.52537700 | -2.37824900 | -0.17708100 |
| H   | -3.85678500 | -1.33323000 | -1.45341900 |
| H   | -4.94710100 | 0.06680500  | 0.31104900  |
| H   | -3.93198600 | -0.67509600 | 1.56179900  |
| C   | -1.60137000 | 0.23089500  | -0.19167300 |
| C   | -0.57022800 | 1.18740100  | -0.43448300 |
| C   | -2.87787300 | 0.65701400  | 0.23926100  |
| C   | -0.79055000 | 2.55278500  | -0.19006400 |
| H   | 0.22955200  | 0.95451600  | -1.22977200 |
| C   | -3.08571100 | 2.03399000  | 0.44710600  |
| C   | -2.05400800 | 2.96987600  | 0.25821300  |
| H   | 0.02261700  | 3.26719100  | -0.36688000 |
| H   | -4.07503800 | 2.37857700  | 0.78011700  |
| H   | -2.24251600 | 4.03532900  | 0.44391200  |
| N   | -0.00443900 | -1.45796200 | -0.15682800 |
| O   | 0.35244300  | -2.77339300 | -0.06665800 |
| H   | 1.34270600  | -2.69732400 | 0.10367600  |

**Complex (2):** (E = -2572.52350911 a.u)

O 1

|    |             |             |             |
|----|-------------|-------------|-------------|
| Pd | -2.49625200 | -0.37269500 | -0.06109400 |
| Cl | -4.38623800 | 0.35300000  | 0.99942700  |
| Cl | -3.13852000 | -2.54649000 | -0.13614700 |
| C  | -0.54504200 | 1.75612900  | -0.37088800 |
| C  | 0.06132300  | 3.12707100  | -0.36263300 |
| C  | 1.51452000  | 3.07681600  | -0.85055100 |
| H  | -0.00046800 | 3.52362800  | 0.67285300  |
| H  | -0.56018700 | 3.80519800  | -0.97712600 |
| C  | 2.30922500  | 1.96184600  | -0.15530800 |
| H  | 2.00329400  | 4.05000700  | -0.66653900 |
| H  | 1.53462400  | 2.90630700  | -1.94472200 |
| H  | 3.34712100  | 1.94458300  | -0.52379000 |
| H  | 2.37142300  | 2.15743500  | 0.93594200  |
| C  | 0.25881900  | 0.54995800  | -0.55400300 |
| C  | -0.40273200 | -0.69955300 | -0.75327200 |
| C  | 1.66165200  | 0.60902700  | -0.36060800 |
| C  | 0.30488300  | -1.90914600 | -0.68818500 |
| H  | -1.35432400 | -0.72570100 | -1.40991000 |
| C  | 2.33003700  | -0.63576000 | -0.33262400 |
| C  | 1.68620000  | -1.87864300 | -0.45887200 |
| H  | -0.22845300 | -2.85770000 | -0.82355000 |
| H  | 2.27239300  | -2.80280700 | -0.40219600 |
| N  | -1.80496800 | 1.51950900  | -0.10079400 |
| O  | -2.58509200 | 2.59875400  | 0.18906700  |
| H  | -3.43820300 | 2.15421200  | 0.48879100  |
| S  | 4.13991900  | -0.73303500 | -0.12790700 |
| O  | 4.82804700  | 0.25423700  | -1.01073700 |
| O  | 4.55480400  | -2.16318500 | -0.09256700 |
| Cl | 4.33776100  | 0.00619000  | 1.89249700  |

**Complex (3):** (E = -1816.51594223 a.u)

-1 1

|    |             |             |             |
|----|-------------|-------------|-------------|
| C  | -0.12629200 | 1.72190100  | -0.28032700 |
| C  | 0.51697300  | 3.07464700  | -0.19104900 |
| C  | 1.98790100  | 2.99829600  | -0.62492600 |
| H  | 0.43175800  | 3.42212700  | 0.86108000  |
| H  | -0.06519500 | 3.79882200  | -0.79268500 |
| C  | 2.72549300  | 1.84226500  | 0.06203700  |
| H  | 2.48862900  | 3.96095100  | -0.40659200 |
| H  | 2.03365800  | 2.85143000  | -1.72342500 |
| H  | 3.76114400  | 1.75175100  | -0.31020500 |
| H  | 2.81421800  | 2.01863200  | 1.15431500  |
| C  | 0.65849400  | 0.50609800  | -0.44470300 |
| C  | -0.04024800 | -0.72538900 | -0.69133300 |
| C  | 2.03984800  | 0.51078000  | -0.16400400 |
| C  | 0.65920800  | -1.94269400 | -0.56207100 |
| H  | -0.88228900 | -0.71544900 | -1.45693100 |
| C  | 2.75732000  | -0.72068600 | -0.06359600 |
| C  | 2.02439400  | -1.91933000 | -0.24305500 |
| H  | 0.12440000  | -2.88424000 | -0.74288500 |
| H  | 2.58195000  | -2.86185600 | -0.15014000 |
| N  | -1.40530600 | 1.51449300  | -0.08919900 |
| Pd | -2.12591800 | -0.36108000 | -0.06393300 |
| O  | -2.18271600 | 2.61803700  | 0.19312000  |
| H  | -3.06108800 | 2.17664800  | 0.40939900  |
| Cl | -4.15324200 | 0.45257900  | 0.77336200  |
| Cl | -2.81556300 | -2.54469200 | -0.17141700 |
| B  | 4.36769900  | -0.77059500 | 0.31874600  |
| O  | 4.79671900  | -2.19257000 | 0.46626700  |
| H  | 5.56416100  | -2.29454000 | -0.11997700 |
| O  | 5.14937400  | -0.07592500 | -0.75076800 |
| H  | 5.83400400  | 0.42343200  | -0.27121100 |
| O  | 4.56423900  | -0.04441000 | 1.62173200  |
| H  | 4.79570300  | -0.73696900 | 2.26312300  |

**Complex (4):** (E = -1962.33595181 a.u)

-1 1

|    |             |             |             |
|----|-------------|-------------|-------------|
| Pd | -1.65064900 | -0.28566600 | -0.04801200 |
| Cl | -3.69923900 | 0.78406100  | 0.62364100  |
| Cl | -2.47208400 | -2.43759700 | -0.07467500 |
| C  | 0.48820500  | 1.63869300  | -0.28972700 |
| C  | 1.24485500  | 2.92993400  | -0.18946000 |
| C  | 2.73327100  | 2.69822500  | -0.49094400 |
| H  | 1.10506200  | 3.33095700  | 0.83737600  |
| H  | 0.79311100  | 3.68198700  | -0.86522700 |
| C  | 3.28448600  | 1.47966000  | 0.26337900  |
| H  | 3.31313100  | 3.60553700  | -0.23372800 |
| H  | 2.86087000  | 2.52836000  | -1.57934600 |
| H  | 4.34195700  | 1.28420500  | 0.00408300  |
| H  | 3.28666400  | 1.67031800  | 1.35927900  |
| C  | 1.15538400  | 0.34891600  | -0.41385900 |
| C  | 0.31255600  | -0.79808600 | -0.74633200 |
| C  | 2.48938200  | 0.22764800  | -0.02869400 |
| C  | 0.90550300  | -2.09360800 | -0.54742500 |
| H  | -0.27257900 | -0.69718300 | -1.68730800 |
| C  | 3.07217500  | -1.09415500 | 0.12840000  |
| C  | 2.20765600  | -2.22699900 | -0.11190700 |
| H  | 0.29264600  | -2.97883800 | -0.76228300 |
| H  | 2.64393800  | -3.22359300 | 0.03819900  |
| N  | -0.80638900 | 1.52853500  | -0.11625500 |
| O  | -1.50181200 | 2.68856100  | 0.12437200  |
| S  | 4.70009000  | -1.32058300 | 0.61414100  |
| H  | -2.42551300 | 2.30871800  | 0.31704900  |

**Complex (5):** (E = -1487.44994119 a.u)

O 1

|    |             |             |             |
|----|-------------|-------------|-------------|
| Pd | -0.91641600 | -0.23729900 | -0.09354300 |
| Cl | -2.91194600 | 0.68899500  | 0.55394400  |
| Cl | -1.70618300 | -2.36594600 | -0.15774700 |
| C  | 1.21525900  | 1.74231100  | -0.20224200 |
| C  | 1.84329300  | 3.09961500  | -0.24684200 |
| H  | 1.68890100  | 3.63139400  | 0.71179600  |
| H  | 1.35880700  | 3.71177300  | -1.02884600 |
| C  | 1.94181300  | 0.46964000  | -0.14886100 |
| C  | 1.22913800  | -0.73951200 | -0.42526200 |
| C  | 3.26707700  | 0.37317500  | 0.31637000  |
| C  | 1.81511300  | -1.99631300 | -0.19103000 |
| H  | 0.41349600  | -0.72995300 | -1.23790600 |
| C  | 3.85339800  | -0.88524100 | 0.52779600  |
| C  | 3.12946400  | -2.06776700 | 0.29236700  |
| H  | 3.59453700  | -3.04470200 | 0.47678200  |
| N  | -0.08656100 | 1.59503100  | -0.13467900 |
| H  | 1.22909600  | -2.90022000 | -0.39897300 |
| H  | 4.88444800  | -0.94195500 | 0.90136000  |
| H  | 3.83467300  | 1.28111300  | 0.55624200  |
| H  | 2.92196700  | 3.03484900  | -0.45802700 |
| O  | -0.83371600 | 2.73502700  | -0.07977200 |
| H  | -1.75429100 | 2.36072800  | 0.09236300  |



**Complex (6):** (E = -1488.45190461 a.u)

0 1

|    |             |             |             |
|----|-------------|-------------|-------------|
| C  | -0.68348900 | 2.11316400  | -0.03810400 |
| C  | -1.66126600 | -0.02605300 | 0.00761500  |
| C  | -2.97855200 | 0.54925000  | -0.00357000 |
| C  | -3.09551600 | 1.96647500  | -0.03113500 |
| C  | -1.94937700 | 2.74215600  | -0.04840300 |
| H  | 0.25217800  | 2.68852100  | -0.04665800 |
| C  | -1.50302600 | -1.44538000 | 0.03140800  |
| C  | -4.11191800 | -0.31374500 | 0.00515600  |
| H  | -4.09395400 | 2.42444200  | -0.04031500 |
| H  | -1.99499400 | 3.83740000  | -0.07095900 |
| C  | -3.94331400 | -1.68910100 | 0.02020500  |
| C  | -2.63980300 | -2.24842700 | 0.03136100  |
| H  | -5.11551500 | 0.13163300  | -0.00617800 |
| H  | -4.81707000 | -2.35344200 | 0.02228900  |
| H  | -2.52146300 | -3.34038700 | 0.04283500  |
| N  | -0.53429600 | 0.78468500  | -0.01208300 |
| Pd | 1.30855100  | -0.15081300 | -0.02320200 |
| C  | -0.12051300 | -2.01570000 | 0.07103200  |
| H  | 0.49102800  | -1.65236300 | -0.82477800 |
| H  | 0.37983400  | -1.81880300 | 1.04402300  |
| H  | -0.06835300 | -3.10305700 | -0.06676000 |
| Cl | 2.49492400  | 1.77474500  | 0.10255500  |
| Cl | 3.22011400  | -1.37269600 | -0.05402700 |

**Complex (Cl<sup>1</sup> replaced by CH<sub>3</sub>): [PdCl(CH<sub>3</sub>)(1-tetralone oxime)]**

(E = -1144.58365822 a.u)

O 1

|    |             |             |             |
|----|-------------|-------------|-------------|
| Pd | 1.46746400  | 0.31339200  | -0.11601000 |
| Cl | 3.25774200  | -0.97818800 | 0.53084000  |
| C  | -1.06246100 | -1.23827600 | -0.19547300 |
| C  | -2.05207400 | -2.36884600 | -0.15703400 |
| C  | -3.48594600 | -1.86475200 | -0.37876100 |
| H  | -1.95871700 | -2.87305200 | 0.82808900  |
| H  | -1.76368200 | -3.13017700 | -0.90626500 |
| C  | -3.78621100 | -0.64394200 | 0.50484500  |
| H  | -4.20420100 | -2.67828100 | -0.16887000 |
| H  | -3.61758100 | -1.58016600 | -1.44147800 |
| H  | -4.81665100 | -0.27961400 | 0.33442800  |
| H  | -3.73360000 | -0.93923300 | 1.57497700  |
| C  | -1.49143600 | 0.16325700  | -0.17262400 |
| C  | -0.54755600 | 1.20841600  | -0.42321200 |
| C  | -2.80387600 | 0.47977500  | 0.24755800  |
| C  | -0.91303700 | 2.54950700  | -0.21641800 |
| H  | 0.28005800  | 1.04281000  | -1.22363500 |
| C  | -3.14499800 | 1.83271900  | 0.43619100  |
| C  | -2.20844200 | 2.85808200  | 0.22928600  |
| H  | -0.18934000 | 3.34755500  | -0.42289200 |
| H  | -4.16454800 | 2.08523300  | 0.76038300  |
| H  | -2.49700900 | 3.90479100  | 0.39208700  |
| N  | 0.23188300  | -1.38725600 | -0.13573400 |
| O  | 0.70941200  | -2.67028300 | -0.06155700 |
| H  | 1.68176400  | -2.49927900 | 0.09538200  |
| C  | 2.58054900  | 2.01461000  | -0.14834200 |
| H  | 3.64526900  | 1.77076100  | -0.23230500 |
| H  | 2.26368100  | 2.64139800  | -0.99498000 |
| H  | 2.38407700  | 2.53017600  | 0.80373800  |

**Supplementary Figure 1:** Ball and stick diagrams showing the agostic C-H bond in relation to the Pd coordination plane for complexes (1) to (5)

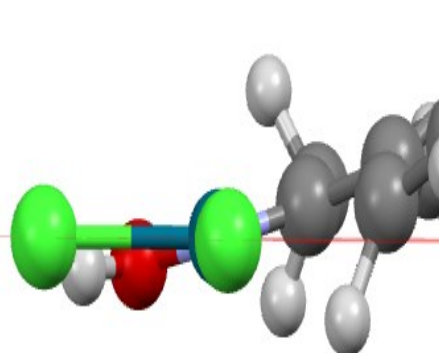

Complex (1)

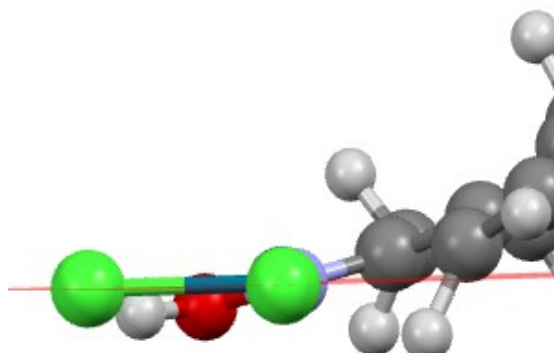

Complex (2)

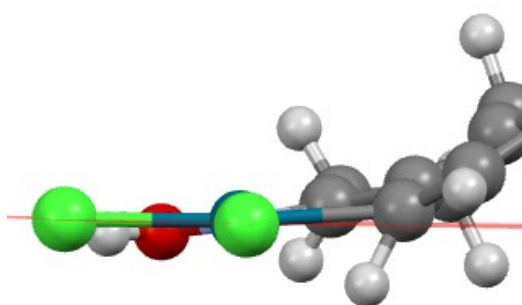

Complex (3)

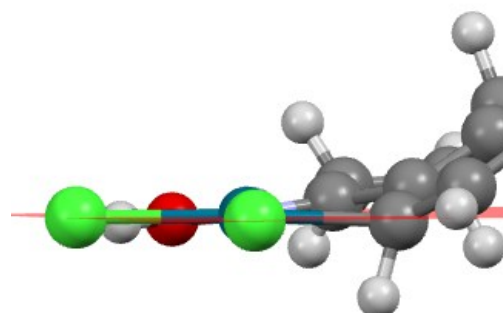

Complex (4)

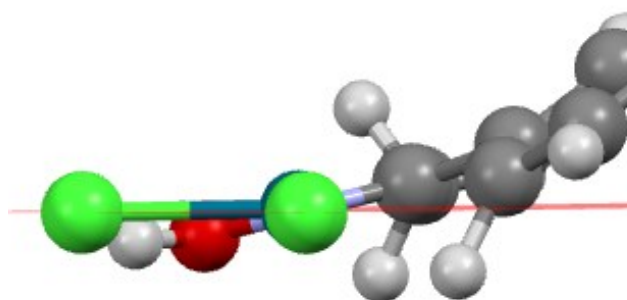

Complex (5)

## Supplementary Figure 2: NBO electron density and contour plots for the various interactions in complex **(1)**

(For larger versions of the NBO images click on the image and expand by the normal angular method.)

NBOView2.0<sup>6</sup> was employed to plot the contours of the donor-acceptor interactions. The default parameter values were used for all the contours:

Contour value: 0.0316

Contour tolerance: 0.0001

Stepsize: 0.4000

(The outermost value (0.0316 a.u) of the contour corresponds roughly to the empirical van der Waals radius).<sup>6</sup>

Complex 1: [Pd(Cl)<sub>2</sub>(1-tetralone oxime)]

1) C(8)-H(8)σ to Pd-Cl (trans)\* (agostic donation E(2) = 58.6 kcalmol<sup>-1</sup>)

Contour plot

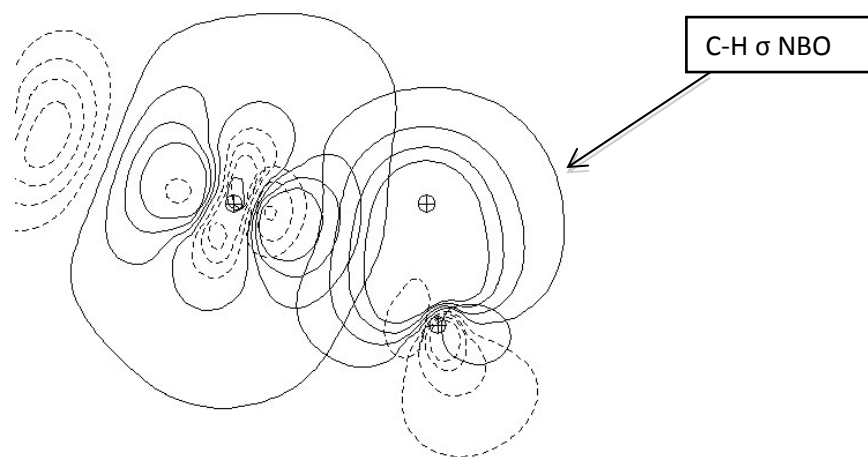

3D Surfaces showing NBOs interaction,

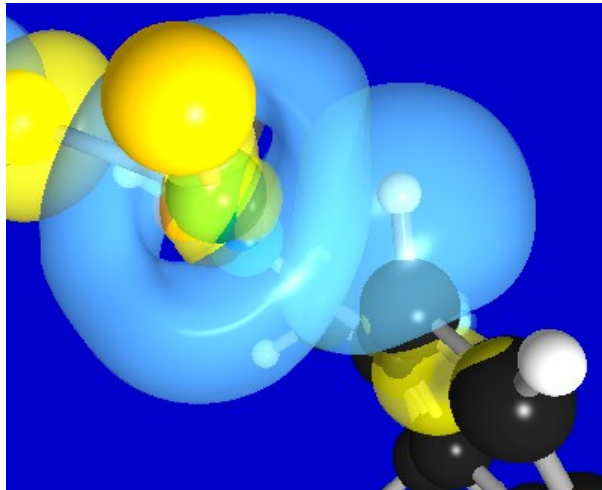

2) C(8)-H(8) $\sigma$  to Pd-Cl (*cis*)\* [agostic donation  $E(2) = 10.0 \text{ kcalmol}^{-1}$ ]

Contour plot

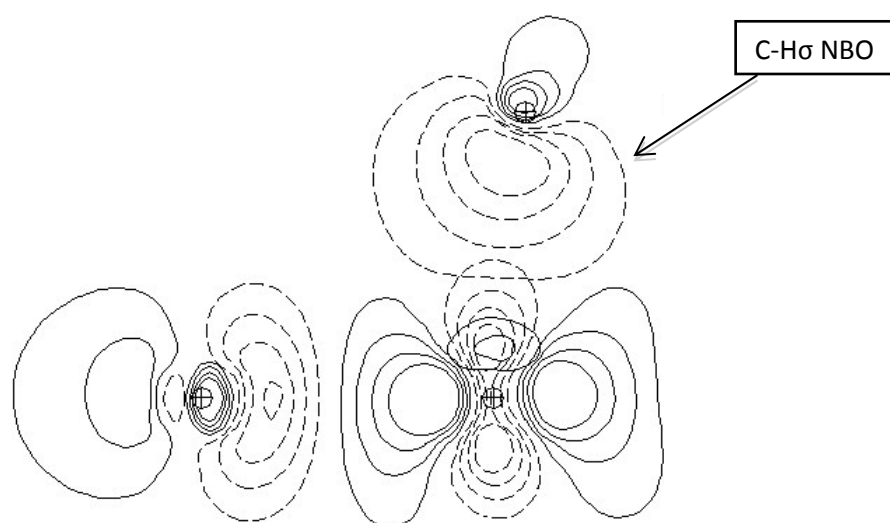

3D Surfaces showing NBOs interaction

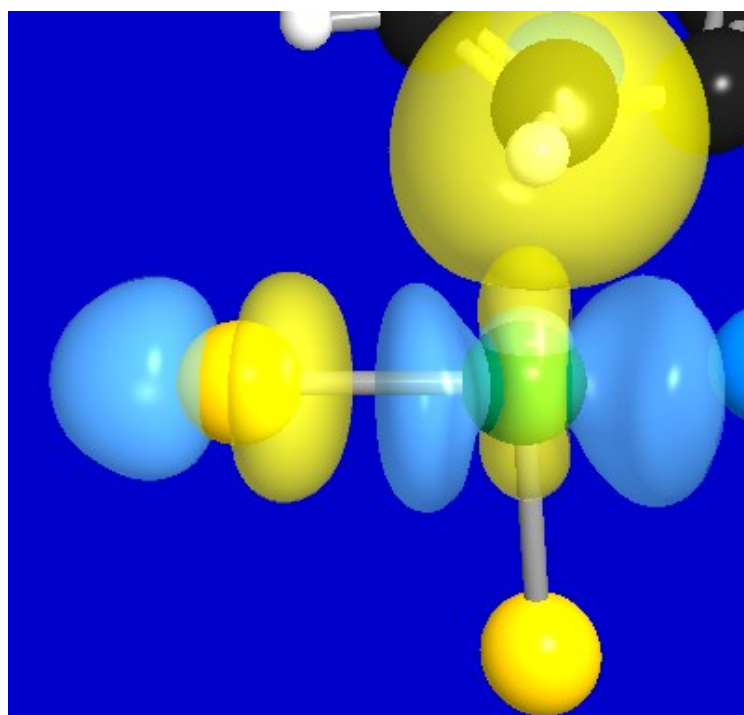

3) C(7)-C(8) $\pi$  to Pd-Cl (*trans*)  $\sigma^*$  [ $E(2)$ ]=20.3 kcalmol<sup>-1</sup>]

Contour plot

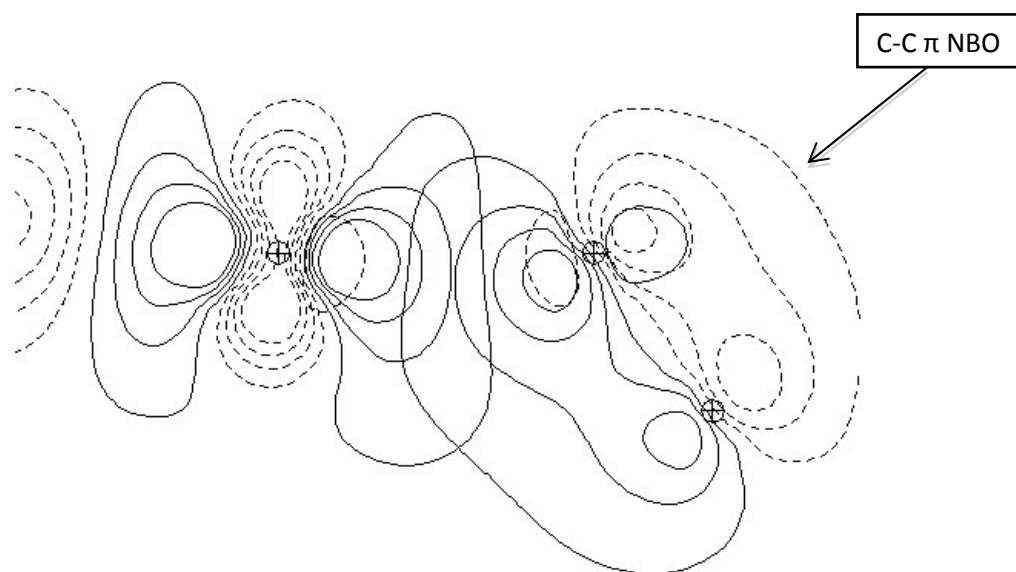

3D Surfaces showing NBOs interaction

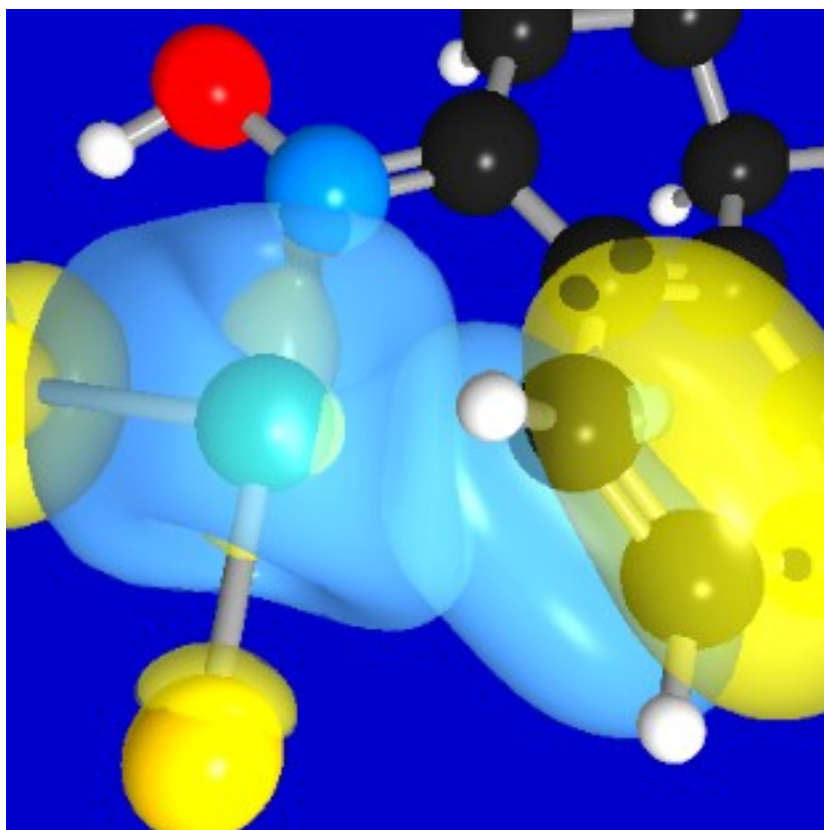

4) C(7)-C(8) $\pi$  to BD\*(1) Pd-Cl (*cis*)  $\sigma^*$  ( $E(2)=6.5 \text{ kcalmol}^{-1}$ )

Contour plot

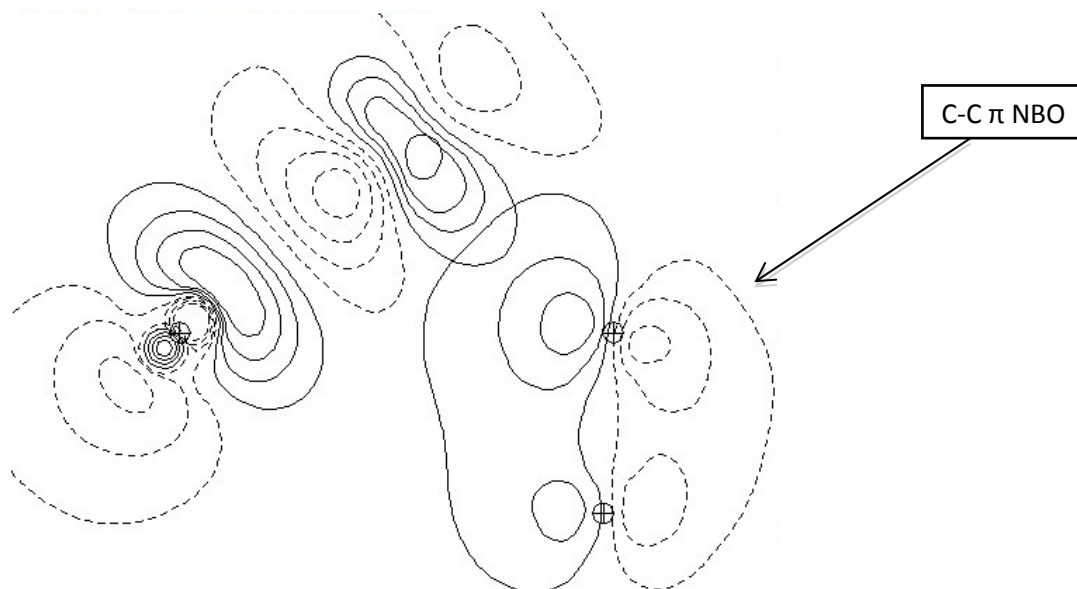

3D Surfaces showing NBOs interaction

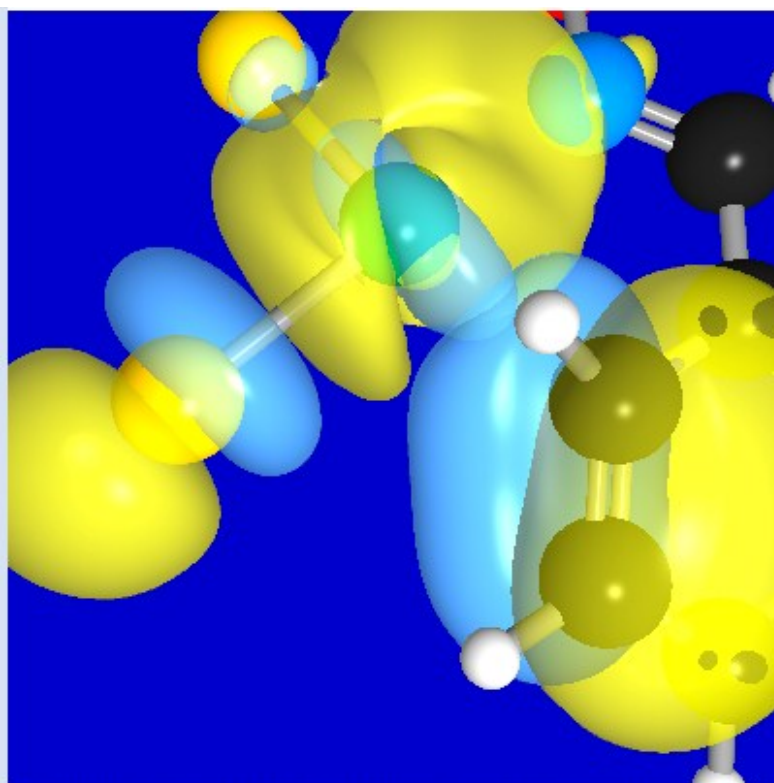



5) Lone pair (4) Pd to C(8)-H(8) $\sigma^*$  [ $E(2)=4.9 \text{ kcalmol}^{-1}$ ]

Contour plot

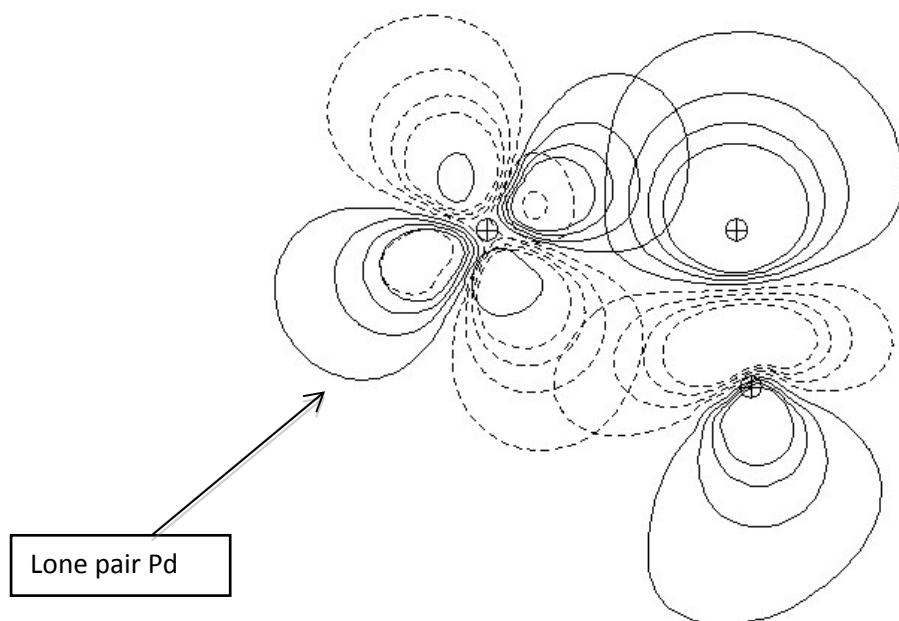

3D Surfaces showing NBOs interaction

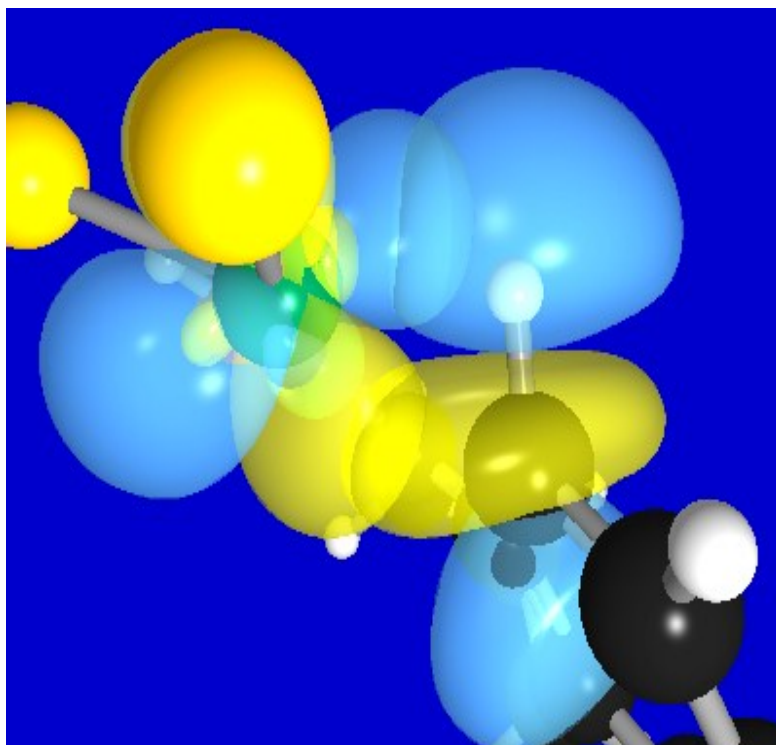

6) Lone pair (3) Pd to C(8)-H(8) $\sigma^*$  [ $E(2) = 2.9 \text{ kcalmol}^{-1}$ ]

Contour plot

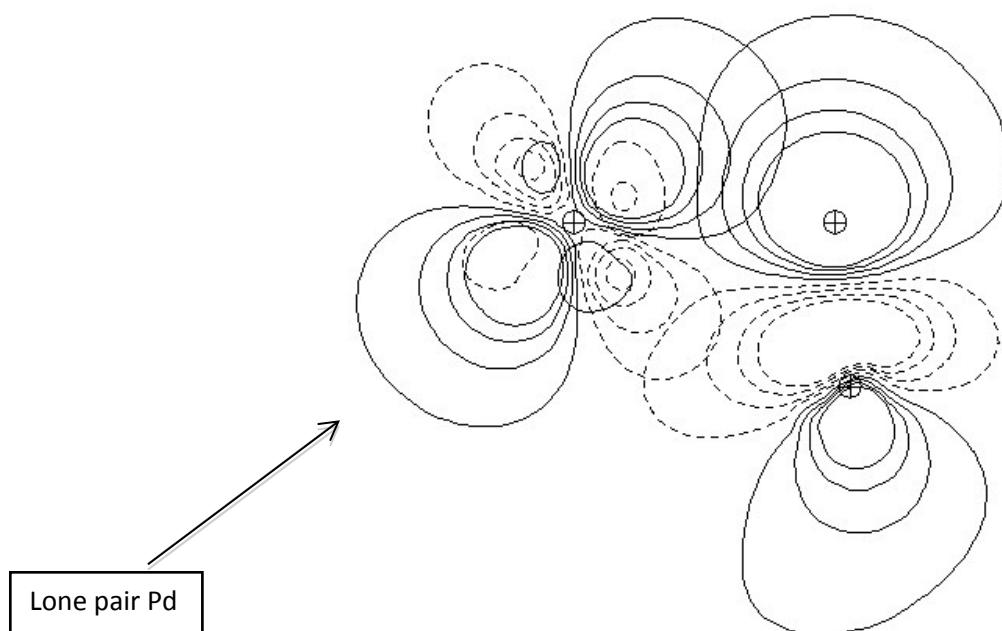

3D Surfaces showing NBOs interaction

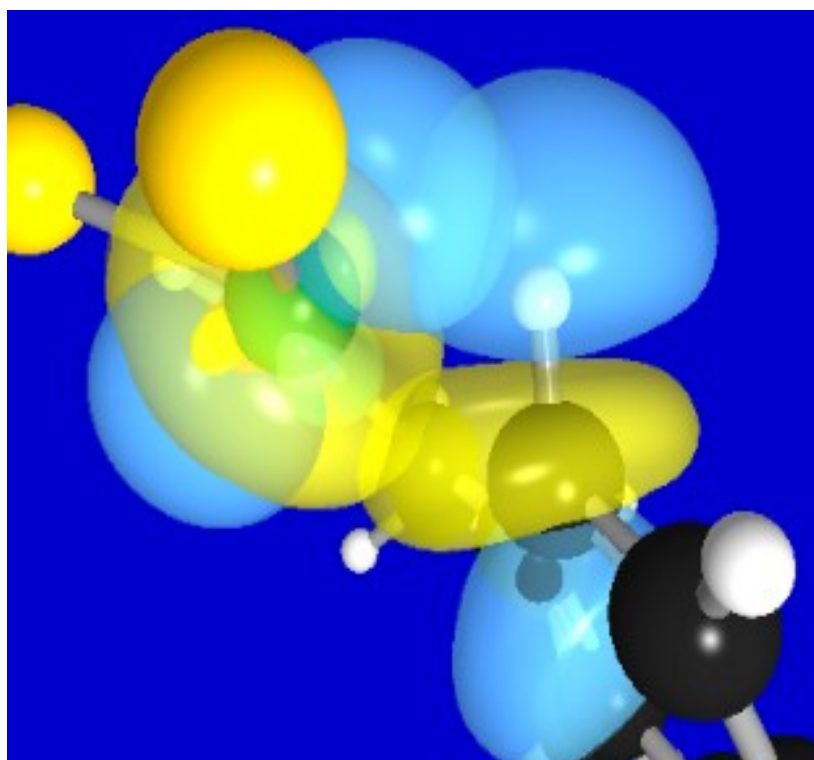

**Supplementary Figure 3:** Optimised structure of complex with  $\text{N}=\text{NPO}(\text{OCH}_2\text{CH}_3)_2$

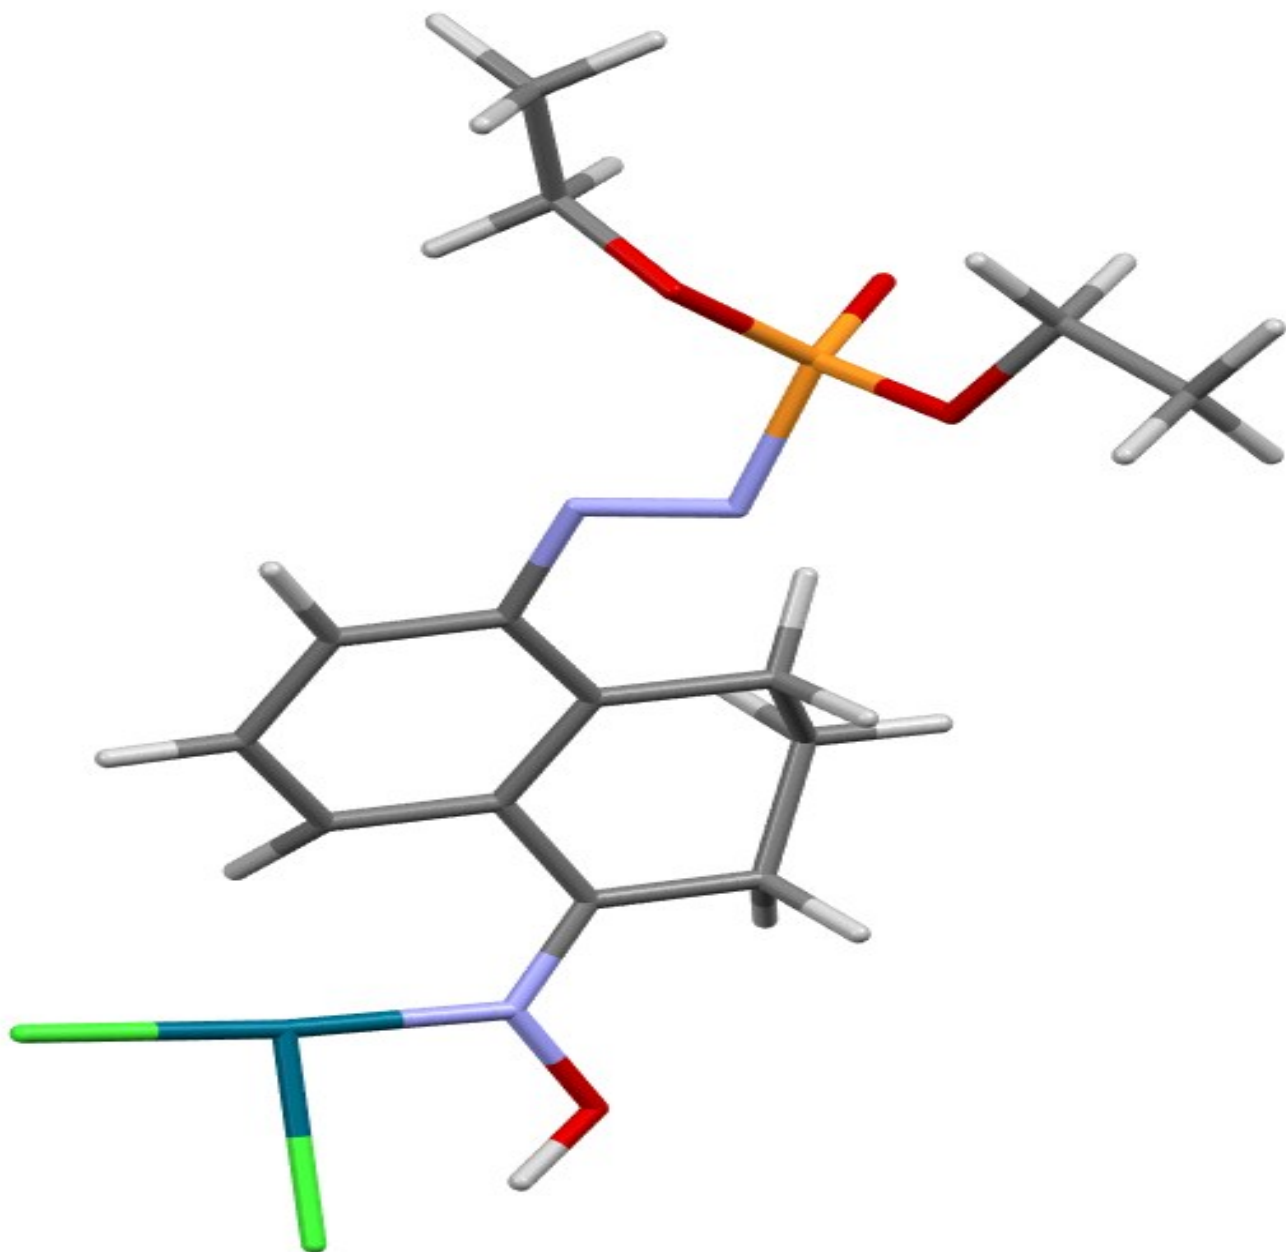

**Supplementary Table 1:** QTAIM aromatic ring C and H atomic charges for complexes (1) to (5) and [PdCl(CH<sub>3</sub>)(1-tetralone oxime)].

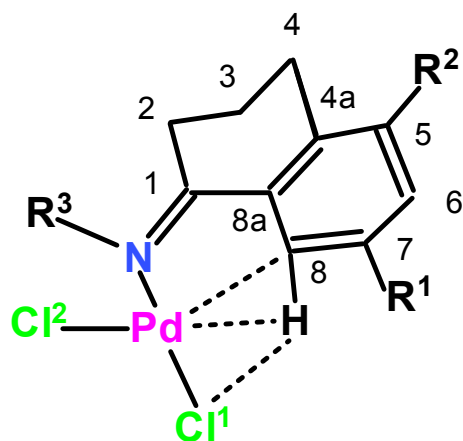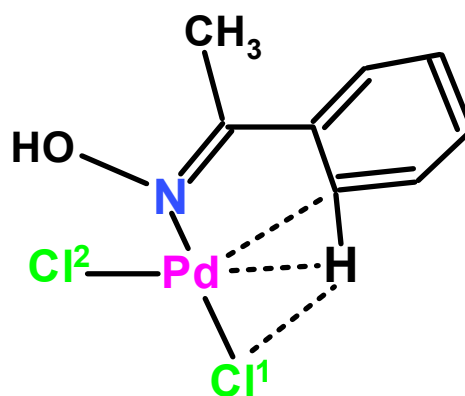

(1)  $R^1 = R^2 = H, R^3 = OH$

(2)  $R^1 = H, R^2 = SO_2Cl, R^3 = OH$

(3)  $R^1 = H, R^2 = B(OH)_3^-, R^3 = OH$

(4)  $R^1 = H, R^2 = S^-, R^3 = OH$

(5)

(Free ligand values in brackets\_

| Atom | Complex 1          | Complex 2          | Complex 3          | Complex 4          | Complex 5          | Cl <sup>1</sup> replaced by CH <sub>3</sub> |
|------|--------------------|--------------------|--------------------|--------------------|--------------------|---------------------------------------------|
| C4a  | -0.003<br>(-0.014) | 0.023<br>(0.015)   | -0.009<br>(-0.022) | -0.012<br>(-0.025) | -0.005<br>(-0.019) | -0.006<br>(-0.014)                          |
| C5   | -0.006<br>(-0.019) | -0.094<br>(-0.102) | -0.408<br>(-0.444) | -0.310<br>(-0.214) | 0.003<br>(-0.011)  | -0.010<br>(-0.019)                          |
| C6   | -0.002<br>(-0.015) | 0.016<br>(0.007)   | -0.025<br>(-0.038) | -0.015<br>(-0.027) | -0.000<br>(-0.014) | -0.006<br>(-0.015)                          |
| C7   | 0.012<br>(-0.014)  | 0.024<br>(0.002)   | -0.007<br>(-0.041) | -0.007<br>(-0.038) | 0.014<br>(-0.011)  | 0.005<br>(-0.014)                           |
| C8   | -0.084<br>(0.001)  | -0.073<br>(0.015)  | -0.112<br>(-0.025) | -0.089<br>(-0.040) | -0.086<br>(0.002)  | -0.080<br>(0.001)                           |
| C8a  | -0.001<br>(-0.015) | 0.009<br>(-0.004)  | -0.017<br>(-0.034) | -0.014<br>(-0.029) | 0.015<br>(-0.001)  | -0.003<br>(-0.015)                          |
| H5   | 0.026<br>(0.006)   | N/A                | N/A                | N/A                | 0.037<br>(0.015)   | 0.020<br>(0.006)                            |
| H6   | 0.038<br>(0.014)   | 0.102<br>(0.086)   | 0.051<br>(0.020)   | 0.021<br>(-0.005)  | 0.041<br>(0.016)   | 0.029<br>(0.014)                            |
| H7   | 0.079<br>(0.014)   | 0.096<br>(0.037)   | 0.047<br>(-0.033)  | 0.050<br>(-0.035)  | 0.083<br>(0.016)   | 0.043<br>(0.014)                            |
| H8   | 0.056<br>(0.040)   | 0.060<br>(0.057)   | 0.053<br>(0.001)   | 0.051<br>(-0.003)  | 0.057<br>(0.039)   | 0.041<br>(0.040)                            |
| H4a  | N/A                | N/A                | N/A                | N/A                | 0.029<br>(0.011)   | N/A                                         |

**Supplementary Table 2:** QTAIM properties of C(8)-H(8) bond critical point for complexes (1) to (5) charges for complexes (1) to (5) and [PdCl(CH<sub>3</sub>)(1-tetralone oxime)].

| Property                                                                            | Complex 1                   | Complex 2                   | Complex 3                   | Complex 4                   | Complex 5                   | Cl <sup>1</sup> replaced by CH <sub>3</sub> |
|-------------------------------------------------------------------------------------|-----------------------------|-----------------------------|-----------------------------|-----------------------------|-----------------------------|---------------------------------------------|
| Electron density, $\rho(\text{bcp})$<br>[e/bohr <sup>3</sup> ]                      | 0.2333<br><b>(0.2810)</b>   | 0.2315<br><b>(0.2825)</b>   | 0.2392<br><b>(0.2778)</b>   | 0.2566<br><b>(0.2774)</b>   | 0.2338<br><b>(0.2810)</b>   | 0.2274<br><b>(0.2810)</b>                   |
| Laplacian of electron density, $\nabla^2\rho(\text{bcp})$<br>[e/bohr <sup>5</sup> ] | -0.6268<br><b>(-0.9458)</b> | -0.6170<br><b>(-0.9602)</b> | -0.6582<br><b>(-0.9184)</b> | -0.7695<br><b>(-0.9117)</b> | -0.6283<br><b>(-0.9461)</b> | -0.5886<br><b>(-0.9458)</b>                 |
| Ellipticity,<br>$\epsilon(\text{bcp})$                                              | 0.1059<br><b>(0.0126)</b>   | 0.1050<br><b>(0.0087)</b>   | 0.1080<br><b>(0.0182)</b>   | 0.0704<br><b>(0.0291)</b>   | 0.1076<br><b>(0.0132)</b>   | 0.1075<br><b>(0.0126)</b>                   |

Free ligand values in brackets ( )

**Supplementary Table 3:** Second order perturbation energy  $E(2)$  (kcalmol<sup>-1</sup>) values for donor-acceptor NBOs interactions for complexes (1) to (6) and [PdCl(CH<sub>3</sub>)(1-tetralone oxime)].

**Complex (1):**

(1) R<sup>1</sup> = R<sup>2</sup> = H, R<sup>3</sup> = OH

| Donor (L) NBO         | Acceptor (NL) NBO     | $E(2)$ kcalmol <sup>-1</sup> |
|-----------------------|-----------------------|------------------------------|
| 27. LP (1)Pd 1        | 89. BD*(2) C 15- C 17 | 0.67                         |
| 27. LP (1)Pd 1        | 90. BD*(1) C 15- H 18 | 0.15                         |
| 28. LP (2)Pd 1        | 87. BD*(2) C 14- C 16 | 0.07                         |
| 28. LP (2)Pd 1        | 88. BD*(1) C 15- C 17 | 0.60                         |
| 28. LP (2)Pd 1        | 89. BD*(2) C 15- C 17 | 0.12                         |
| 28. LP (2)Pd 1        | 90. BD*(1) C 15- H 18 | 0.13                         |
| 28. LP (2)Pd 1        | 98. BD*(1) N 24- O 25 | 2.60                         |
| 29. LP (3)Pd 1        | 90. BD*(1) C 15- H 18 | 2.85                         |
| 29. LP (3)Pd 1        | 98. BD*(1) N 24- O 25 | 0.13                         |
| 30. LP (4)Pd 1        | 75. BD*(2) C 4- N 24  | 1.34                         |
| 30. LP (4)Pd 1        | 87. BD*(2) C 14- C 16 | 0.09                         |
| 30. LP (4)Pd 1        | 89. BD*(2) C 15- C 17 | 1.60                         |
| 30. LP (4)Pd 1        | 90. BD*(1) C 15- H 18 | 4.87                         |
| 33. LP (3)Cl 2        | 99. BD*(1) O 25- H 26 | 16.63                        |
| 36. LP (3)Cl 3        | 90. BD*(1) C 15- H 18 | 0.22                         |
| 40. BD (1)Pd 1-Cl 2   | 89. BD*(2) C 15- C 17 | 1.97                         |
| 40. BD (1)Pd 1-Cl 2   | 90. BD*(1) C 15- H 18 | 0.49                         |
| 40. BD (1)Pd 1-Cl 2   | 98. BD*(1) N 24- O 25 | 0.11                         |
| 40. BD (1)Pd 1-Cl 2   | 99. BD*(1) O 25- H 26 | 0.93                         |
| 41. BD (1)Pd 1-Cl 3   | 89. BD*(2) C 15- C 17 | 1.01                         |
| 41. BD (1)Pd 1-Cl 3   | 90. BD*(1) C 15- H 18 | 0.68                         |
| 41. BD (1)Pd 1-Cl 3   | 98. BD*(1) N 24- O 25 | 0.32                         |
| 41. BD (1)Pd 1-Cl 3   | 99. BD*(1) O 25- H 26 | 0.12                         |
| 37. LP (1) N 24       | 70. BD*(1)Pd 1-Cl 2   | 17.57                        |
| 37. LP (1) N 24       | 71. BD*(1)Pd 1-Cl 3   | 105.35                       |
| 38. LP (1) O 25       | 70. BD*(1)Pd 1-Cl 2   | 0.19                         |
| 38. LP (1) O 25       | 71. BD*(1)Pd 1-Cl 3   | 0.32                         |
| 42. BD (1) C 4- C 5   | 70. BD*(1)Pd 1-Cl 2   | 0.44                         |
| 42. BD (1) C 4- C 5   | 71. BD*(1)Pd 1-Cl 3   | 0.71                         |
| 44. BD (1) C 4- N 24  | 70. BD*(1)Pd 1-Cl 2   | 1.02                         |
| 44. BD (1) C 4- N 24  | 71. BD*(1)Pd 1-Cl 3   | 4.49                         |
| 55. BD (1) C 14- C 15 | 70. BD*(1)Pd 1-Cl 2   | 1.42                         |
| 55. BD (1) C 14- C 15 | 71. BD*(1)Pd 1-Cl 3   | 0.43                         |
| 59. BD (2) C 15- C 17 | 70. BD*(1)Pd 1-Cl 2   | 20.33                        |
| 59. BD (2) C 15- C 17 | 71. BD*(1)Pd 1-Cl 3   | 6.48                         |
| 60. BD (1) C 15- H 18 | 70. BD*(1)Pd 1-Cl 2   | 58.60                        |
| 60. BD (1) C 15- H 18 | 71. BD*(1)Pd 1-Cl 3   | 9.97                         |
| 68. BD (1) N 24- O 25 | 70. BD*(1)Pd 1-Cl 2   | 0.22                         |
| 57. BD (2) C 14- C 16 | 75. BD*(2) C 4- N 24  | 20.95                        |
| 57. BD (2) C 14- C 16 | 79. BD*(1) C 6- C 9   | 0.59                         |
| 57. BD (2) C 14- C 16 | 82. BD*(1) C 9- H 12  | 1.05                         |
| 57. BD (2) C 14- C 16 | 83. BD*(1) C 9- H 13  | 3.13                         |
| 57. BD (2) C 14- C 16 | 89. BD*(2) C 15- C 17 | 12.54                        |

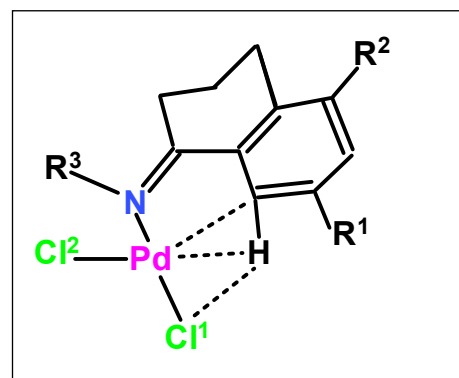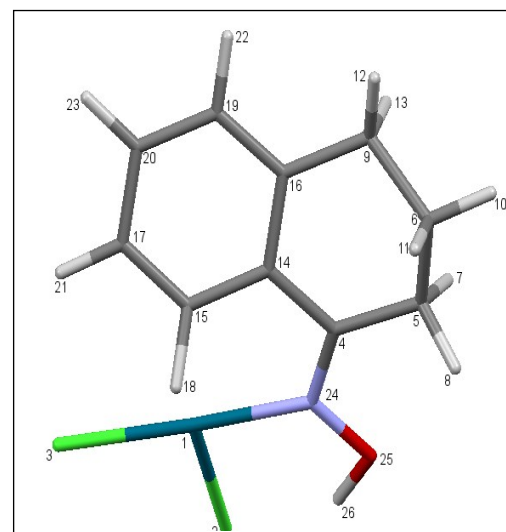

|                        |                        |       |
|------------------------|------------------------|-------|
| 57. BD ( 2) C 14- C 16 | 90. BD*( 1) C 15- H 18 | 1.11  |
| 57. BD ( 2) C 14- C 16 | 95. BD*( 2) C 19- C 20 | 15.14 |
| 58. BD ( 1) C 15- C 17 | 73. BD*( 1) C 4- C 14  | 2.83  |
| 58. BD ( 1) C 15- C 17 | 85. BD*( 1) C 14- C 15 | 1.99  |
| 58. BD ( 1) C 15- C 17 | 90. BD*( 1) C 15- H 18 | 0.52  |
| 58. BD ( 1) C 15- C 17 | 92. BD*( 1) C 17- C 20 | 1.29  |
| 58. BD ( 1) C 15- C 17 | 93. BD*( 1) C 17- H 21 | 0.84  |
| 58. BD ( 1) C 15- C 17 | 97. BD*( 1) C 20- H 23 | 2.07  |
| 59. BD ( 2) C 15- C 17 | 87. BD*( 2) C 14- C 16 | 15.30 |
| 59. BD ( 2) C 15- C 17 | 90. BD*( 1) C 15- H 18 | 3.71  |
| 59. BD ( 2) C 15- C 17 | 95. BD*( 2) C 19- C 20 | 13.50 |
| 62. BD ( 1) C 17- C 20 | 90. BD*( 1) C 15- H 18 | 2.59  |
| 69. BD ( 1) O 25- H 26 | 74. BD*( 1) C 4- N 24  | 3.88  |

**Complex (2):****(2) R<sup>1</sup> = H, R<sup>2</sup> = SO<sub>2</sub>Cl, R<sup>3</sup> = OH****Donor (L) NBO**

39. LP ( 1)Pd 1  
 39. LP ( 1)Pd 1  
 39. LP ( 1)Pd 1  
 40. LP ( 2)Pd 1  
 41. LP ( 3)Pd 1  
 42. LP ( 4)Pd 1  
 43. LP ( 1)Cl 2  
 43. LP ( 1)Cl 2  
 43. LP ( 1)Cl 2  
 44. LP ( 2)Cl 2  
 45. LP ( 3)Cl 2  
 45. LP ( 3)Cl 2  
 45. LP ( 3)Cl 2  
 46. LP ( 1)Cl 3  
 47. LP ( 2)Cl 3  
 48. LP ( 3)Cl 3  
 48. LP ( 3)Cl 3  
 48. LP ( 3)Cl 3  
 61. BD ( 1)Pd 1-Cl 2  
 62. BD ( 1)Pd 1-Cl 3  
 62. BD ( 1)Pd 1-Cl 3

**Acceptor (NL) NBO**

97. BD\*( 1) C 4- C 14  
 112. BD\*( 1) C 15- C 17  
 113. BD\*( 2) C 15- C 17  
 96. BD\*( 1) C 4- C 5  
 98. BD\*( 1) C 4- N 23  
 109. BD\*( 1) C 14- C 15  
 110. BD\*( 1) C 14- C 16  
 112. BD\*( 1) C 15- C 17  
 113. BD\*( 2) C 15- C 17  
 116. BD\*( 1) C 17- C 20  
 122. BD\*( 1) N 23- O 24  
 99. BD\*( 2) C 4- N 23  
 109. BD\*( 1) C 14- C 15  
 113. BD\*( 2) C 15- C 17  
 114. BD\*( 1) C 15- H 18  
 122. BD\*( 1) N 23- O 24  
 99. BD\*( 2) C 4- N 23  
 11. BD\*( 2) C 14- C 16  
 112. BD\*( 1) C 15- C 17  
 113. BD\*( 2) C 15- C 17  
 114. BD\*( 1) C 15- H 18  
 122. BD\*( 1) N 23- O 24  
 112. BD\*( 1) C 15- C 17  
 113. BD\*( 2) C 15- C 17  
 123. BD\*( 1) O 24- H 25  
 99. BD\*( 2) C 4- N 23  
 113. BD\*( 2) C 15- C 17  
 114. BD\*( 1) C 15- H 18  
 98. BD\*( 1) C 4- N 23  
 113. BD\*( 2) C 15- C 17  
 123. BD\*( 1) O 24- H 25  
 112. BD\*( 1) C 15- C 17  
 113. BD\*( 2) C 15- C 17  
 117. BD\*( 1) C 17- H 21  
 122. BD\*( 1) N 23- O 24  
 109. BD\*( 1) C 14- C 15  
 114. BD\*( 1) C 15- H 18  
 116. BD\*( 1) C 17- C 20  
 117. BD\*( 1) C 17- H 21  
 123. BD\*( 1) O 24- H 25  
 114. BD\*( 1) C 15- H 18  
 116. BD\*( 1) C 17- C 20  
 117. BD\*( 1) C 17- H 21  
 98. BD\*( 1) C 4- N 23  
 112. BD\*( 1) C 15- C 17  
 113. BD\*( 2) C 15- C 17  
 114. BD\*( 1) C 15- H 18  
 117. BD\*( 1) C 17- H 21  
 123. BD\*( 1) O 24- H 25  
 109. BD\*( 1) C 14- C 15  
 112. BD\*( 1) C 15- C 17

**E (2) kcalmol<sup>-1</sup>**

0.05  
 0.06  
 1.49  
 0.06  
 0.83  
 0.34  
 0.06  
 0.92  
 0.21  
 0.06  
 2.31  
 3.80  
 0.11  
 0.26  
 2.39  
 0.11  
 1.04  
 0.10  
 0.06  
 1.63  
 5.35  
 0.07  
 0.06  
 0.41  
 0.25  
 0.11  
 0.13  
 0.17  
 0.17  
 0.19  
 16.31  
 0.05  
 0.25  
 0.08  
 0.06  
 0.12  
 0.10  
 0.10  
 0.29  
 0.06  
 0.15  
 0.05  
 0.16  
 0.13  
 0.32  
 2.99  
 0.15  
 0.10  
 0.85  
 0.24  
 0.09

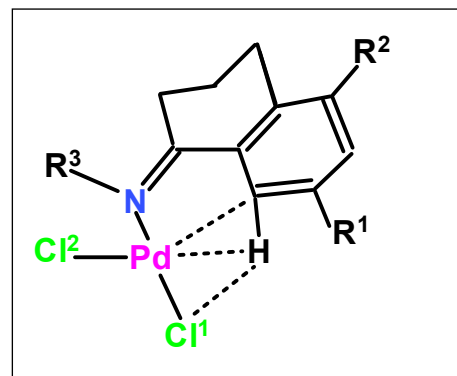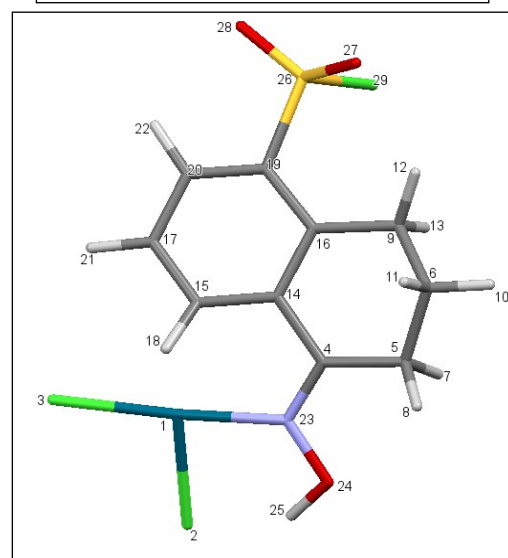



|                               |                                |             |
|-------------------------------|--------------------------------|-------------|
| 62. BD ( 1)Pd 1-Cl 3          | 113. BD*( 2) C 15- C 17        | 1.46        |
| 62. BD ( 1)Pd 1-Cl 3          | 114. BD*( 1) C 15- H 18        | 0.34        |
| 62. BD ( 1)Pd 1-Cl 3          | 122. BD*( 1) N 23- O 24        | 0.20        |
| 62. BD ( 1)Pd 1-Cl 3          | 123. BD*( 1) O 24- H 25        | 0.11        |
| 49. LP ( 1) N 23              | 94. BD*( 1)Pd 1-Cl 2           | 16.45       |
| 49. LP ( 1) N 23              | 95. BD*( 1)Pd 1-Cl 3           | 104.63      |
| 50. LP ( 1) O 24              | 94. BD*( 1)Pd 1-Cl 2           | 0.18        |
| 50. LP ( 1) O 24              | 95. BD*( 1)Pd 1-Cl 3           | 0.31        |
| 63. BD ( 1) C 4- C 5          | 94. BD*( 1)Pd 1-Cl 2           | 0.48        |
| 63. BD ( 1) C 4- C 5          | 95. BD*( 1)Pd 1-Cl 3           | 0.75        |
| 65. BD ( 1) C 4- N 23         | 94. BD*( 1)Pd 1-Cl 2           | 0.96        |
| 65. BD ( 1) C 4- N 23         | 95. BD*( 1)Pd 1-Cl 3           | 4.35        |
| 66. BD ( 2) C 4- N 23         | 95. BD*( 1)Pd 1-Cl 3           | 0.25        |
| 76. BD ( 1) C 14- C 15        | 94. BD*( 1)Pd 1-Cl 2           | 0.65        |
| 76. BD ( 1) C 14- C 15        | 95. BD*( 1)Pd 1-Cl 3           | 0.10        |
| 79. BD ( 1) C 15- C 17        | 94. BD*( 1)Pd 1-Cl 2           | 0.16        |
| 79. BD ( 1) C 15- C 17        | 95. BD*( 1)Pd 1-Cl 3           | 0.59        |
| 80. BD ( 2) C 15- C 17        | 94. BD*( 1)Pd 1-Cl 2           | 27.55       |
| 80. BD ( 2) C 15- C 17        | 95. BD*( 1)Pd 1-Cl 3           | 0.47        |
| 81. BD ( 1) C 15- H 18        | 94. BD*( 1)Pd 1-Cl 2           | 75.57       |
| 81. BD ( 1) C 15- H 18        | 95. BD*( 1)Pd 1-Cl 3           | 14.98       |
| 83. BD ( 1) C 17- C 20        | 94. BD*( 1)Pd 1-Cl 2           | 0.57        |
| 83. BD ( 1) C 17- C 20        | 95. BD*( 1)Pd 1-Cl 3           | 0.37        |
| 49. LP ( 1) N 23              | 96. BD*( 1) C 4- C 5           | 7.96        |
| 49. LP ( 1) N 23              | 97. BD*( 1) C 4- C 14          | 0.82        |
| 49. LP ( 1) N 23              | 109. BD*( 1) C 14- C 15        | 0.64        |
| 49. LP ( 1) N 23              | 123. BD*( 1) O 24- H 25        | 0.71        |
| 51. LP ( 2) O 24              | 99. BD*( 2) C 4- N 23          | 20.11       |
| 52. LP ( 1) O 27              | 106. BD*( 1) C 9- H 12         | 0.59        |
| 52. LP ( 1) O 27              | 120. BD*( 1) C 19- S 26        | 0.84        |
| 52. LP ( 1) O 27              | 125. BD*( 1) S 26- O 28        | 1.38        |
| 77. BD ( 1) C 14- C 16        | 97. BD*( 1) C 4- C 14          | 1.70        |
| 77. BD ( 1) C 14- C 16        | 98. BD*( 1) C 4- N 23          | 1.37        |
| 77. BD ( 1) C 14- C 16        | 106. BD*( 1) C 9- H 12         | 0.64        |
| 77. BD ( 1) C 14- C 16        | 108. BD*( 1) C 9- C 16         | 1.14        |
| 77. BD ( 1) C 14- C 16        | 109. BD*( 1) C 14- C 15        | 2.72        |
| 77. BD ( 1) C 14- C 16        | 114. BD*( 1) C 15- H 18        | 1.85        |
| 77. BD ( 1) C 14- C 16        | 115. BD*( 1) C 16- C 19        | 2.30        |
| 77. BD ( 1) C 14- C 16        | 120. BD*( 1) C 19- S 26        | 4.46        |
| 78. BD ( 2) C 14- C 16        | 99. BD*( 2) C 4- N 23          | 20.74       |
| 78. BD ( 2) C 14- C 16        | 103. BD*( 1) C 6- C 9          | 0.51        |
| 78. BD ( 2) C 14- C 16        | 106. BD*( 1) C 9- H 12         | 0.91        |
| 78. BD ( 2) C 14- C 16        | 107. BD*( 1) C 9- H 13         | 2.88        |
| 78. BD ( 2) C 14- C 16        | 113. BD*( 2) C 15- C 17        | 12.03       |
| 78. BD ( 2) C 14- C 16        | 114. BD*( 1) C 15- H 18        | 0.92        |
| 78. BD ( 2) C 14- C 16        | 119. BD*( 2) C 19- C 20        | 14.49       |
| 79. BD ( 1) C 15- C 17        | 97. BD*( 1) C 4- C 14          | 3.22        |
| 79. BD ( 1) C 15- C 17        | 109. BD*( 1) C 14- C 15        | 1.62        |
| 79. BD ( 1) C 15- C 17        | 116. BD*( 1) C 17- C 20        | 1.41        |
| 79. BD ( 1) C 15- C 17        | 117. BD*( 1) C 17- H 21        | 1.08        |
| 79. BD ( 1) C 15- C 17        | 121. BD*( 1) C 20- H 22        | 2.27        |
| 80. BD ( 2) C 15- C 17        | 97. BD*( 1) C 4- C 14          | 0.73        |
| 80. BD ( 2) C 15- C 17        | 110. BD*( 1) C 14- C 16        | 0.50        |
| 80. BD ( 2) C 15- C 17        | 111. BD*( 2) C 14- C 16        | 15.96       |
| 80. BD ( 2) C 15- C 17        | 113. BD*( 2) C 15- C 17        | 0.78        |
| <b>80. BD ( 2) C 15- C 17</b> | <b>114. BD*( 1) C 15- H 18</b> | <b>3.16</b> |
| 80. BD ( 2) C 15- C 17        | 119. BD*( 2) C 19- C 20        | 16.82       |
| 81. BD ( 1) C 15- H 18        | 97. BD*( 1) C 4- C 14          | 0.98        |

|                        |                         |      |
|------------------------|-------------------------|------|
| 81. BD ( 1) C 15- H 18 | 110. BD*( 1) C 14- C 16 | 5.48 |
| 81. BD ( 1) C 15- H 18 | 113. BD*( 2) C 15- C 17 | 1.68 |
| 81. BD ( 1) C 15- H 18 | 116. BD*( 1) C 17- C 20 | 4.69 |
| 81. BD ( 1) C 15- H 18 | 117. BD*( 1) C 17- H 21 | 0.89 |



|                        |                         |      |
|------------------------|-------------------------|------|
| 80. BD ( 1)Pd 21-CI 24 | 92. BD*( 1) C 1- N 20   | 0.13 |
| 80. BD ( 1)Pd 21-CI 24 | 106. BD*( 1) C 12- C 14 | 0.26 |
| 80. BD ( 1)Pd 21-CI 24 | 107. BD*( 2) C 12- C 14 | 2.59 |
| 80. BD ( 1)Pd 21-CI 24 | 111. BD*( 1) C 14- H 18 | 0.06 |
| 80. BD ( 1)Pd 21-CI 24 | 118. BD*( 1) O 22- H 23 | 1.18 |
| 81. BD ( 1)Pd 21-CI 25 | 93. BD*( 2) C 1- N 20   | 0.07 |
| 81. BD ( 1)Pd 21-CI 25 | 103. BD*( 1) C 11- C 12 | 0.25 |
| 81. BD ( 1)Pd 21-CI 25 | 106. BD*( 1) C 12- C 14 | 0.08 |
| 81. BD ( 1)Pd 21-CI 25 | 107. BD*( 2) C 12- C 14 | 1.31 |
| 81. BD ( 1)Pd 21-CI 25 | 108. BD*( 1) C 12- H 15 | 0.14 |
| 81. BD ( 1)Pd 21-CI 25 | 115. BD*( 1) N 20- O 22 | 0.20 |
| 81. BD ( 1)Pd 21-CI 25 | 118. BD*( 1) O 22- H 23 | 0.08 |



|                        |                              |               |
|------------------------|------------------------------|---------------|
| 52. BD ( 1) C 4- N 23  | 78. BD*( 1)Pd 1-Cl 3         | 3.90          |
| 52. BD ( 1) C 4- N 23  | 80. BD*( 1) C 4- C 5         | 1.20          |
| 52. BD ( 1) C 4- N 23  | 81. BD*( 1) C 4- C 14        | 1.14          |
| 52. BD ( 1) C 4- N 23  | 84. BD*( 1) C 5- C 6         | 0.59          |
| 52. BD ( 1) C 4- N 23  | 94. BD*( 1) C 14- C 16       | 1.33          |
| 52. BD ( 1) C 4- N 23  | 107. BD*( 1) O 24- H 26      | 1.02          |
| 53. BD ( 2) C 4- N 23  | 83. BD*( 2) C 4- N 23        | 2.27          |
| 53. BD ( 2) C 4- N 23  | 85. BD*( 1) C 5- H 7         | 1.53          |
| 53. BD ( 2) C 4- N 23  | 86. BD*( 1) C 5- H 8         | 1.21          |
| 53. BD ( 2) C 4- N 23  | 95. BD*( 2) C 14- C 16       | 7.72          |
| 63. BD ( 1) C 14- C 15 | 78. BD*( 1)Pd 1-Cl 3         | 1.86          |
| 63. BD ( 1) C 14- C 15 | 79. BD*( 1)Pd 1- C 15        | 1.14          |
| 63. BD ( 1) C 14- C 15 | 80. BD*( 1) C 4- C 5         | 3.25          |
| 63. BD ( 1) C 14- C 15 | 81. BD*( 1) C 4- C 14        | 1.58          |
| 63. BD ( 1) C 14- C 15 | 92. BD*( 1) C 9- C 16        | 2.98          |
| 63. BD ( 1) C 14- C 15 | 94. BD*( 1) C 14- C 16       | 2.26          |
| 63. BD ( 1) C 14- C 15 | 96. BD*( 1) C 15- C 17       | 1.36          |
| 63. BD ( 1) C 14- C 15 | 101. BD*( 1) C 17- H 21      | 2.25          |
| 65. BD ( 2) C 14- C 16 | 79. BD*( 1)Pd 1- C 15        | 1.28          |
| 65. BD ( 2) C 14- C 16 | 97. BD*( 1) C 15- H 18       | 3.30          |
| 67. BD ( 1) C 15- H 18 | 78. BD*( 1)Pd 1-Cl 3         | 3.10          |
| 67. BD ( 1) C 15- H 18 | 79. BD*( 1)Pd 1- C 15        | 2.70          |
| 67. BD ( 1) C 15- H 18 | 94. BD*( 1) C 14- C 16       | 1.29          |
| 67. BD ( 1) C 15- H 18 | 95. BD*( 2) C 14- C 16       | 4.27          |
| 67. BD ( 1) C 15- H 18 | 99. BD*( 1) C 17- C 20       | 2.20          |
| 67. BD ( 1) C 15- H 18 | 100. BD*( 2) C 17- C 20      | 3.55          |
| 69. BD ( 1) C 17- C 20 | 79. BD*( 1)Pd 1- C 15        | 1.02          |
| 69. BD ( 1) C 17- C 20 | 96. BD*( 1) C 15- C 17       | 1.35          |
| 69. BD ( 1) C 17- C 20 | 97. BD*( 1) C 15- H 18       | 1.35          |
| 69. BD ( 1) C 17- C 20 | 101. BD*( 1) C 17- H 21      | 0.77          |
| 69. BD ( 1) C 17- C 20 | 102. BD*( 1) C 19- C 20      | 1.64          |
| 69. BD ( 1) C 17- C 20 | 103. BD*( 1) C 19- S 25      | 2.72          |
| 69. BD ( 1) C 17- C 20 | 105. BD*( 1) C 20- H 22      | 0.80          |
| 70. BD ( 2) C 17- C 20 | 79. BD*( 1)Pd 1- C 15        | 3.95          |
| 70. BD ( 2) C 17- C 20 | 97. BD*( 1) C 15- H 18       | 2.58          |
| 70. BD ( 2) C 17- C 20 | 104. BD*( 2) C 19- S 25      | 25.60         |
| 37. LP ( 2)Cl 2        | 78. BD*( 1)Pd 1-Cl 3         | 3.29          |
| 37. <b>LP ( 2)Cl 2</b> | <b>79. BD*( 1)Pd 1- C 15</b> | <b>9.27</b>   |
| 37. LP ( 2)Cl 2        | 107. BD*( 1) O 24- H 26      | 0.63          |
| 38. LP ( 3)Cl 2        | 78. BD*( 1)Pd 1-Cl 3         | 1.02          |
| 38. <b>LP ( 3)Cl 2</b> | <b>79. BD*( 1)Pd 1- C 15</b> | <b>1.86</b>   |
| 38. LP ( 3)Cl 2        | 82. BD*( 1) C 4- N 23        | 0.10          |
| 38. LP ( 3)Cl 2        | 107. BD*( 1) O 24- H 26      | 23.09         |
| 39. LP ( 4)Cl 2        | 78. BD*( 1)Pd 1-Cl 3         | 39.34         |
| 39. <b>LP ( 4)Cl 2</b> | <b>79. BD*( 1)Pd 1- C 15</b> | <b>100.63</b> |
| 39. LP ( 4)Cl 2        | 80. BD*( 1) C 4- C 5         | 0.10          |
| 39. LP ( 4)Cl 2        | 82. BD*( 1) C 4- N 23        | 0.82          |
| 39. LP ( 4)Cl 2        | 93. BD*( 1) C 14- C 15       | 0.28          |
| 39. LP ( 4)Cl 2        | 94. BD*( 1) C 14- C 16       | 0.43          |
| 39. LP ( 4)Cl 2        | 101. BD*( 1) C 17- H 21      | 0.05          |
| 39. LP ( 4)Cl 2        | 106. BD*( 1) N 23- O 24      | 0.36          |
| 39. LP ( 4)Cl 2        | 107. BD*( 1) O 24- H 26      | 0.81          |

### Acetophenone oxime complex (5):

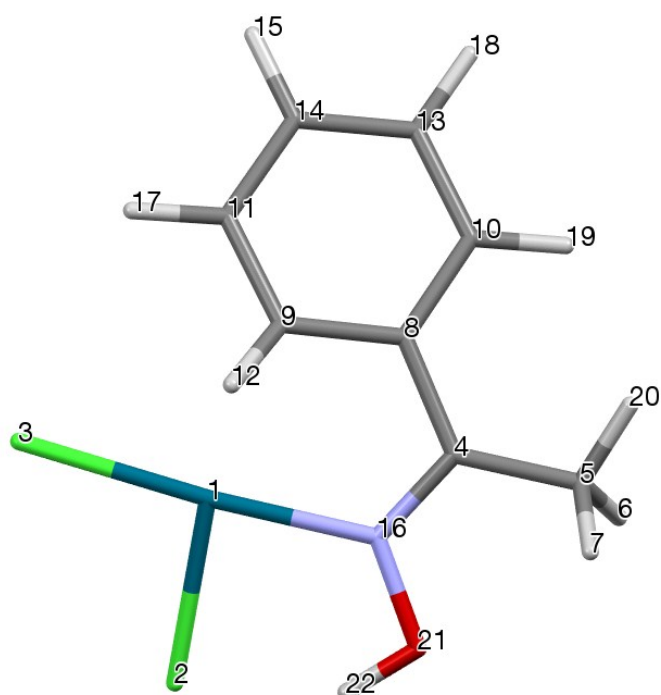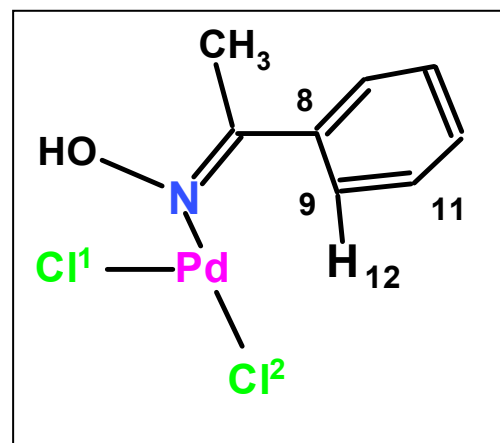

#### Donor (L) NBO

25. LP (1)Pd 1  
 25. LP (1)Pd 1  
 26. LP (2)Pd 1  
 26. LP (2)Pd 1  
 28. LP (4)Pd 1  
 28. LP (4)Pd 1  
 29. LP (1)Cl 2  
 29. LP (1)Cl 2  
 31. LP (3)Cl 2  
 31. LP (3)Cl 2  
 32. LP (1)Cl 3  
 32. LP (1)Cl 3  
 33. LP (2)Cl 3  
 33. LP (2)Cl 3  
 34. LP (3)Cl 3  
 34. LP (3)Cl 3  
 38. BD (1)Pd 1-Cl 2  
 38. BD (1)Pd 1-Cl 2  
 39. BD (1)Pd 1-Cl 3  
 39. BD (1)Pd 1-Cl 3  
 25. LP (1)Pd 1  
 25. LP (1)Pd 1  
 25. LP (1)Pd 1  
 26. LP (2)Pd 1  
 26. LP (2)Pd 1  
 26. LP (2)Pd 1

#### Acceptor (NL) NBO

63. BD\*(1)Pd 1-Cl 2  
 64. BD\*(1)Pd 1-Cl 3  
 72. BD\*(1) C 8- C 9  
 73. BD\*(2) C 8- C 9  
 76. BD\*(1) C 9- H 12  
 67. BD\*(1) C 4- N 16  
 74. BD\*(1) C 8- C 10  
 75. BD\*(1) C 9- C 11

#### E (2) kcalmol<sup>-1</sup>

11.07  
 9.51  
 1.72  
 1.76  
 1.02  
 1.19  
 2.82  
 3.26  
 1.45  
 1.86  
 2.85  
 1.84  
 3.51  
 2.04  
 0.72  
 0.55  
 11.01  
 32.78  
 23.01  
 3.69  
 0.13  
 0.69  
 0.15  
 0.87  
 0.08  
 0.78

|                       |                        |        |
|-----------------------|------------------------|--------|
| 26. LP ( 2)Pd 1       | 76. BD*( 1) C 9- H 12  | 0.14   |
| 26. LP ( 2)Pd 1       | 86. BD*( 1) N 16- O 21 | 2.51   |
| 27. LP ( 3)Pd 1       | 68. BD*( 2) C 4- N 16  | 3.56   |
| 27. LP ( 3)Pd 1       | 72. BD*( 1) C 8- C 9   | 0.10   |
| 27. LP ( 3)Pd 1       | 73. BD*( 2) C 8- C 9   | 0.49   |
| 27. LP ( 3)Pd 1       | 76. BD*( 1) C 9- H 12  | 2.90   |
| 27. LP ( 3)Pd 1       | 86. BD*( 1) N 16- O 21 | 0.10   |
| 28. LP ( 4)Pd 1       | 68. BD*( 2) C 4- N 16  | 1.56   |
| 28. LP ( 4)Pd 1       | 73. BD*( 2) C 8- C 9   | 0.78   |
| 28. LP ( 4)Pd 1       | 76. BD*( 1) C 9- H 12  | 5.00   |
| 29. LP ( 1)Cl 2       | 73. BD*( 2) C 8- C 9   | 0.27   |
| 29. LP ( 1)Cl 2       | 76. BD*( 1) C 9- H 12  | 0.08   |
| 29. LP ( 1)Cl 2       | 87. BD*( 1) O 21- H 22 | 0.28   |
| 30. LP ( 2)Cl 2       | 68. BD*( 2) C 4- N 16  | 0.12   |
| 30. LP ( 2)Cl 2       | 73. BD*( 2) C 8- C 9   | 0.06   |
| 30. LP ( 2)Cl 2       | 76. BD*( 1) C 9- H 12  | 0.13   |
| 31. LP ( 3)Cl 2       | 67. BD*( 1) C 4- N 16  | 0.17   |
| 31. LP ( 3)Cl 2       | 73. BD*( 2) C 8- C 9   | 0.16   |
| 31. LP ( 3)Cl 2       | 86. BD*( 1) N 16- O 21 | 0.05   |
| 31. LP ( 3)Cl 2       | 87. BD*( 1) O 21- H 22 | 17.18  |
| 32. LP ( 1)Cl 3       | 73. BD*( 2) C 8- C 9   | 0.17   |
| 32. LP ( 1)Cl 3       | 76. BD*( 1) C 9- H 12  | 0.06   |
| 32. LP ( 1)Cl 3       | 82. BD*( 1) C 11- H 17 | 0.11   |
| 32. LP ( 1)Cl 3       | 86. BD*( 1) N 16- O 21 | 0.08   |
| 33. LP ( 2)Cl 3       | 72. BD*( 1) C 8- C 9   | 0.20   |
| 33. LP ( 2)Cl 3       | 80. BD*( 1) C 11- C 14 | 0.09   |
| 33. LP ( 2)Cl 3       | 82. BD*( 1) C 11- H 17 | 0.32   |
| 33. LP ( 2)Cl 3       | 87. BD*( 1) O 21- H 22 | 0.06   |
| 34. LP ( 3)Cl 3       | 76. BD*( 1) C 9- H 12  | 0.21   |
| 34. LP ( 3)Cl 3       | 81. BD*( 2) C 11- C 14 | 0.07   |
| 34. LP ( 3)Cl 3       | 82. BD*( 1) C 11- H 17 | 0.10   |
| 38. BD ( 1)Pd 1-Cl 2  | 67. BD*( 1) C 4- N 16  | 0.13   |
| 38. BD ( 1)Pd 1-Cl 2  | 73. BD*( 2) C 8- C 9   | 1.97   |
| 38. BD ( 1)Pd 1-Cl 2  | 75. BD*( 1) C 9- C 11  | 0.10   |
| 38. BD ( 1)Pd 1-Cl 2  | 76. BD*( 1) C 9- H 12  | 0.42   |
| 38. BD ( 1)Pd 1-Cl 2  | 82. BD*( 1) C 11- H 17 | 0.06   |
| 38. BD ( 1)Pd 1-Cl 2  | 86. BD*( 1) N 16- O 21 | 0.06   |
| 38. BD ( 1)Pd 1-Cl 2  | 87. BD*( 1) O 21- H 22 | 0.97   |
| 39. BD ( 1)Pd 1-Cl 3  | 73. BD*( 2) C 8- C 9   | 1.20   |
| 39. BD ( 1)Pd 1-Cl 3  | 76. BD*( 1) C 9- H 12  | 0.59   |
| 39. BD ( 1)Pd 1-Cl 3  | 86. BD*( 1) N 16- O 21 | 0.25   |
| 39. BD ( 1)Pd 1-Cl 3  | 87. BD*( 1) O 21- H 22 | 0.11   |
| 35. LP ( 1) N 16      | 63. BD*( 1)Pd 1-Cl 2   | 17.35  |
| 35. LP ( 1) N 16      | 64. BD*( 1)Pd 1-Cl 3   | 106.97 |
| 36. LP ( 1) O 21      | 63. BD*( 1)Pd 1-Cl 2   | 0.19   |
| 36. LP ( 1) O 21      | 64. BD*( 1)Pd 1-Cl 3   | 0.32   |
| 40. BD ( 1) C 4- C 5  | 63. BD*( 1)Pd 1-Cl 2   | 0.53   |
| 40. BD ( 1) C 4- C 5  | 64. BD*( 1)Pd 1-Cl 3   | 0.84   |
| 41. BD ( 1) C 4- C 8  | 63. BD*( 1)Pd 1-Cl 2   | 0.06   |
| 42. BD ( 1) C 4- N 16 | 63. BD*( 1)Pd 1-Cl 2   | 0.84   |
| 42. BD ( 1) C 4- N 16 | 64. BD*( 1)Pd 1-Cl 3   | 3.99   |
| 43. BD ( 2) C 4- N 16 | 64. BD*( 1)Pd 1-Cl 3   | 0.17   |
| 47. BD ( 1) C 8- C 9  | 63. BD*( 1)Pd 1-Cl 2   | 1.47   |
| 47. BD ( 1) C 8- C 9  | 64. BD*( 1)Pd 1-Cl 3   | 0.42   |
| 48. BD ( 2) C 8- C 9  | 63. BD*( 1)Pd 1-Cl 2   | 20.25  |
| 48. BD ( 2) C 8- C 9  | 64. BD*( 1)Pd 1-Cl 3   | 6.75   |
| 50. BD ( 1) C 9- C 11 | 64. BD*( 1)Pd 1-Cl 3   | 0.08   |



|                        |                        |       |
|------------------------|------------------------|-------|
| 51. BD ( 1) C 9- H 12  | 63. BD*( 1)Pd 1-Cl 2   | 56.92 |
| 51. BD ( 1) C 9- H 12  | 64. BD*( 1)Pd 1-Cl 3   | 8.92  |
| 55. BD ( 1) C 11- C 14 | 63. BD*( 1)Pd 1-Cl 2   | 0.08  |
| 56. BD ( 2) C 11- C 14 | 63. BD*( 1)Pd 1-Cl 2   | 0.11  |
| 56. BD ( 2) C 11- C 14 | 64. BD*( 1)Pd 1-Cl 3   | 0.06  |
| 61. BD ( 1) N 16- O 21 | 63. BD*( 1)Pd 1-Cl 2   | 0.20  |
| 35. LP ( 1) N 16       | 65. BD*( 1) C 4- C 5   | 8.31  |
| 35. LP ( 1) N 16       | 66. BD*( 1) C 4- C 8   | 1.58  |
| 35. LP ( 1) N 16       | 87. BD*( 1) O 21- H 22 | 0.68  |
| 37. LP ( 2) O 21       | 68. BD*( 2) C 4- N 16  | 20.27 |
| 40. BD ( 1) C 4- C 5   | 66. BD*( 1) C 4- C 8   | 1.12  |
| 40. BD ( 1) C 4- C 5   | 67. BD*( 1) C 4- N 16  | 0.68  |
| 40. BD ( 1) C 4- C 5   | 72. BD*( 1) C 8- C 9   | 2.22  |
| 40. BD ( 1) C 4- C 5   | 86. BD*( 1) N 16- O 21 | 1.05  |
| 41. BD ( 1) C 4- C 8   | 65. BD*( 1) C 4- C 5   | 0.83  |
| 41. BD ( 1) C 4- C 8   | 67. BD*( 1) C 4- N 16  | 0.88  |
| 41. BD ( 1) C 4- C 8   | 72. BD*( 1) C 8- C 9   | 1.51  |
| 41. BD ( 1) C 4- C 8   | 74. BD*( 1) C 8- C 10  | 1.41  |
| 41. BD ( 1) C 4- C 8   | 75. BD*( 1) C 9- C 11  | 1.98  |
| 41. BD ( 1) C 4- C 8   | 77. BD*( 1) C 10- C 13 | 1.84  |
| 41. BD ( 1) C 4- C 8   | 86. BD*( 1) N 16- O 21 | 5.51  |
| 42. BD ( 1) C 4- N 16  | 65. BD*( 1) C 4- C 5   | 0.93  |
| 42. BD ( 1) C 4- N 16  | 66. BD*( 1) C 4- C 8   | 0.94  |
| 42. BD ( 1) C 4- N 16  | 74. BD*( 1) C 8- C 10  | 1.92  |
| 42. BD ( 1) C 4- N 16  | 87. BD*( 1) O 21- H 22 | 1.05  |
| 43. BD ( 2) C 4- N 16  | 68. BD*( 2) C 4- N 16  | 2.52  |
| 43. BD ( 2) C 4- N 16  | 69. BD*( 1) C 5- H 6   | 1.61  |
| 43. BD ( 2) C 4- N 16  | 70. BD*( 1) C 5- H 7   | 0.99  |
| 43. BD ( 2) C 4- N 16  | 73. BD*( 2) C 8- C 9   | 7.93  |
| 44. BD ( 1) C 5- H 6   | 66. BD*( 1) C 4- C 8   | 1.53  |
| 44. BD ( 1) C 5- H 6   | 68. BD*( 2) C 4- N 16  | 5.94  |
| 45. BD ( 1) C 5- H 7   | 66. BD*( 1) C 4- C 8   | 2.77  |
| 45. BD ( 1) C 5- H 7   | 68. BD*( 2) C 4- N 16  | 4.15  |
| 46. BD ( 1) C 5- H 20  | 67. BD*( 1) C 4- N 16  | 4.90  |
| 47. BD ( 1) C 8- C 9   | 65. BD*( 1) C 4- C 5   | 2.82  |
| 47. BD ( 1) C 8- C 9   | 66. BD*( 1) C 4- C 8   | 1.77  |
| 47. BD ( 1) C 8- C 9   | 74. BD*( 1) C 8- C 10  | 2.29  |
| 47. BD ( 1) C 8- C 9   | 75. BD*( 1) C 9- C 11  | 1.77  |
| 47. BD ( 1) C 8- C 9   | 79. BD*( 1) C 10- H 19 | 2.15  |
| 47. BD ( 1) C 8- C 9   | 82. BD*( 1) C 11- H 17 | 1.81  |
| 48. BD ( 2) C 8- C 9   | 65. BD*( 1) C 4- C 5   | 0.63  |
| 48. BD ( 2) C 8- C 9   | 67. BD*( 1) C 4- N 16  | 0.55  |
| 48. BD ( 2) C 8- C 9   | 68. BD*( 2) C 4- N 16  | 15.44 |
| 48. BD ( 2) C 8- C 9   | 76. BD*( 1) C 9- H 12  | 3.30  |
| 48. BD ( 2) C 8- C 9   | 78. BD*( 2) C 10- C 13 | 13.43 |
| 48. BD ( 2) C 8- C 9   | 81. BD*( 2) C 11- C 14 | 16.64 |
| 49. BD ( 1) C 8- C 10  | 66. BD*( 1) C 4- C 8   | 1.74  |
| 49. BD ( 1) C 8- C 10  | 67. BD*( 1) C 4- N 16  | 1.35  |
| 49. BD ( 1) C 8- C 10  | 68. BD*( 2) C 4- N 16  | 0.53  |
| 49. BD ( 1) C 8- C 10  | 72. BD*( 1) C 8- C 9   | 2.32  |
| 49. BD ( 1) C 8- C 10  | 76. BD*( 1) C 9- H 12  | 2.46  |
| 49. BD ( 1) C 8- C 10  | 77. BD*( 1) C 10- C 13 | 1.47  |
| 49. BD ( 1) C 8- C 10  | 79. BD*( 1) C 10- H 19 | 0.71  |
| 49. BD ( 1) C 8- C 10  | 84. BD*( 1) C 13- H 18 | 1.88  |
| 50. BD ( 1) C 9- C 11  | 66. BD*( 1) C 4- C 8   | 2.70  |
| 50. BD ( 1) C 9- C 11  | 72. BD*( 1) C 8- C 9   | 1.89  |
| 50. BD ( 1) C 9- C 11  | 80. BD*( 1) C 11- C 14 | 1.26  |

|                        |                        |       |
|------------------------|------------------------|-------|
| 50. BD ( 1) C 9- C 11  | 82. BD*( 1) C 11- H 17 | 0.79  |
| 50. BD ( 1) C 9- C 11  | 85. BD*( 1) C 14- H 15 | 2.07  |
| 51. BD ( 1) C 9- H 12  | 73. BD*( 2) C 8- C 9   | 0.57  |
| 51. BD ( 1) C 9- H 12  | 74. BD*( 1) C 8- C 10  | 3.78  |
| 51. BD ( 1) C 9- H 12  | 80. BD*( 1) C 11- C 14 | 3.65  |
| 51. BD ( 1) C 9- H 12  | 82. BD*( 1) C 11- H 17 | 0.55  |
| 52. BD ( 1) C 10- C 13 | 66. BD*( 1) C 4- C 8   | 3.21  |
| 52. BD ( 1) C 10- C 13 | 74. BD*( 1) C 8- C 10  | 1.67  |
| 52. BD ( 1) C 10- C 13 | 79. BD*( 1) C 10- H 19 | 0.74  |
| 52. BD ( 1) C 10- C 13 | 83. BD*( 1) C 13- C 14 | 1.37  |
| 52. BD ( 1) C 10- C 13 | 84. BD*( 1) C 13- H 18 | 0.53  |
| 52. BD ( 1) C 10- C 13 | 85. BD*( 1) C 14- H 15 | 2.00  |
| 53. BD ( 2) C 10- C 13 | 73. BD*( 2) C 8- C 9   | 17.28 |
| 53. BD ( 2) C 10- C 13 | 81. BD*( 2) C 11- C 14 | 13.32 |
| 54. BD ( 1) C 10- H 19 | 72. BD*( 1) C 8- C 9   | 4.47  |
| 54. BD ( 1) C 10- H 19 | 83. BD*( 1) C 13- C 14 | 3.48  |
| 55. BD ( 1) C 11- C 14 | 75. BD*( 1) C 9- C 11  | 1.40  |
| 55. BD ( 1) C 11- C 14 | 76. BD*( 1) C 9- H 12  | 2.44  |
| 55. BD ( 1) C 11- C 14 | 82. BD*( 1) C 11- H 17 | 0.65  |
| 55. BD ( 1) C 11- C 14 | 83. BD*( 1) C 13- C 14 | 1.24  |
| 55. BD ( 1) C 11- C 14 | 84. BD*( 1) C 13- H 18 | 2.10  |
| 55. BD ( 1) C 11- C 14 | 85. BD*( 1) C 14- H 15 | 0.60  |
| 56. BD ( 2) C 11- C 14 | 73. BD*( 2) C 8- C 9   | 13.51 |
| 56. BD ( 2) C 11- C 14 | 76. BD*( 1) C 9- H 12  | 0.60  |
| 56. BD ( 2) C 11- C 14 | 78. BD*( 2) C 10- C 13 | 16.65 |
| 57. BD ( 1) C 11- H 17 | 72. BD*( 1) C 8- C 9   | 3.80  |
| 57. BD ( 1) C 11- H 17 | 83. BD*( 1) C 13- C 14 | 3.45  |
| 58. BD ( 1) C 13- C 14 | 77. BD*( 1) C 10- C 13 | 1.36  |
| 58. BD ( 1) C 13- C 14 | 79. BD*( 1) C 10- H 19 | 2.18  |
| 58. BD ( 1) C 13- C 14 | 80. BD*( 1) C 11- C 14 | 1.27  |
| 58. BD ( 1) C 13- C 14 | 82. BD*( 1) C 11- H 17 | 2.20  |
| 58. BD ( 1) C 13- C 14 | 84. BD*( 1) C 13- H 18 | 0.55  |
| 58. BD ( 1) C 13- C 14 | 85. BD*( 1) C 14- H 15 | 0.60  |
| 59. BD ( 1) C 13- H 18 | 74. BD*( 1) C 8- C 10  | 3.67  |
| 59. BD ( 1) C 13- H 18 | 80. BD*( 1) C 11- C 14 | 3.52  |
| 60. BD ( 1) C 14- H 15 | 75. BD*( 1) C 9- C 11  | 3.68  |
| 60. BD ( 1) C 14- H 15 | 77. BD*( 1) C 10- C 13 | 3.60  |
| 61. BD ( 1) N 16- O 21 | 66. BD*( 1) C 4- C 8   | 3.11  |

### 8-methylquinoline complex (6):

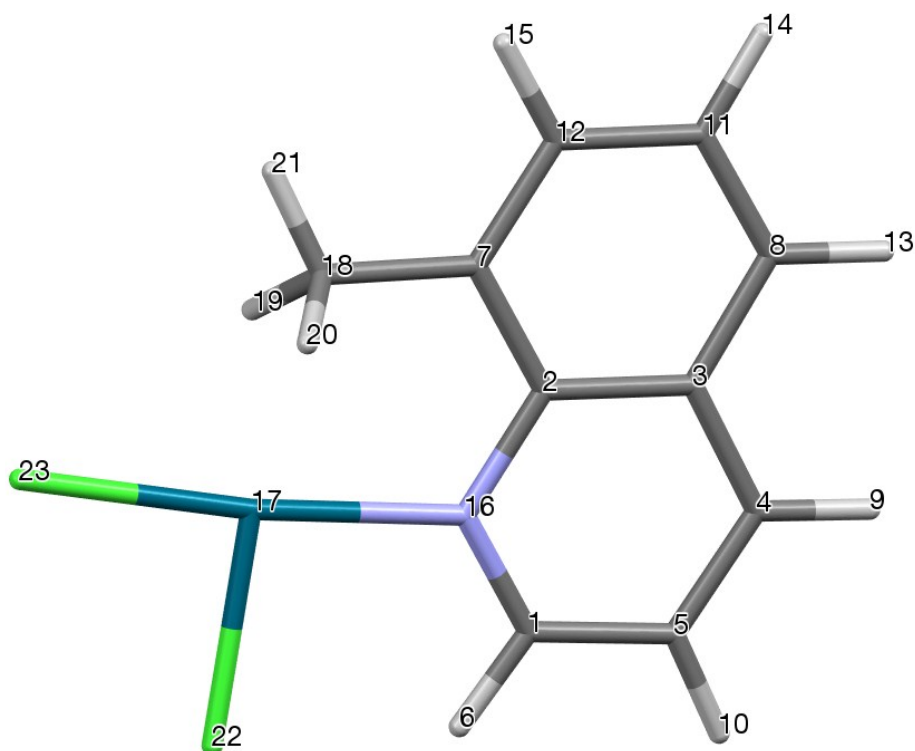

#### Donor (L) NBO

26. LP (1) N 16  
37. BD (1) C 1- C 5  
38. BD (1) C 1- H 6  
38. BD (1) C 1- H 6  
39. BD (1) C 1- N 16  
40. BD (2) C 1- N 16  
40. BD (2) C 1- N 16  
41. BD (1) C 2- C 3  
41. BD (1) C 2- C 3

#### Acceptor (NL) NBO

65. BD\*(1) C 1- C 5  
66. BD\*(1) C 1- H 6  
69. BD\*(1) C 2- C 3  
70. BD\*(1) C 2- C 7  
81. BD\*(1) C 7- C 18  
90. BD\*(1) C 18- H 19  
66. BD\*(1) C 1- H 6  
67. BD\*(1) C 1- N 16  
76. BD\*(1) C 4- C 5  
78. BD\*(1) C 4- H 9  
72. BD\*(1) C 2- N 16  
76. BD\*(1) C 4- C 5  
65. BD\*(1) C 1- C 5  
70. BD\*(1) C 2- C 7  
72. BD\*(1) C 2- N 16  
79. BD\*(1) C 5- H 10  
71. BD\*(2) C 2- C 7  
77. BD\*(2) C 4- C 5  
70. BD\*(1) C 2- C 7  
72. BD\*(1) C 2- N 16  
73. BD\*(1) C 3- C 4  
74. BD\*(1) C 3- C 8  
78. BD\*(1) C 4- H 9  
81. BD\*(1) C 7- C 18  
83. BD\*(1) C 8- H 13

#### E (2) kcalmol<sup>-1</sup>

7.66  
4.41  
10.34  
2.00  
0.87  
0.84  
0.62  
0.54  
1.40  
2.71  
4.80  
3.40  
0.71  
2.62  
1.11  
1.14  
17.35  
7.15  
2.28  
0.76  
1.77  
1.79  
2.00  
2.50  
1.77

|                       |                        |       |
|-----------------------|------------------------|-------|
| 42. BD ( 1) C 2- C 7  | 67. BD*( 1) C 1- N 16  | 2.42  |
| 42. BD ( 1) C 2- C 7  | 69. BD*( 1) C 2- C 3   | 2.01  |
| 42. BD ( 1) C 2- C 7  | 72. BD*( 1) C 2- N 16  | 1.08  |
| 42. BD ( 1) C 2- C 7  | 73. BD*( 1) C 3- C 4   | 2.37  |
| 42. BD ( 1) C 2- C 7  | 80. BD*( 1) C 7- C 12  | 0.99  |
| 42. BD ( 1) C 2- C 7  | 87. BD*( 1) C 12- H 15 | 2.36  |
| 42. BD ( 1) C 2- C 7  | 92. BD*( 1) C 18- H 21 | 1.10  |
| 43. BD ( 2) C 2- C 7  | 68. BD*( 2) C 1- N 16  | 15.36 |
| 43. BD ( 2) C 2- C 7  | 75. BD*( 2) C 3- C 8   | 14.95 |
| 43. BD ( 2) C 2- C 7  | 85. BD*( 2) C 11- C 12 | 16.89 |
| 43. BD ( 2) C 2- C 7  | 90. BD*( 1) C 18- H 19 | 2.19  |
| 43. BD ( 2) C 2- C 7  | 91. BD*( 1) C 18- H 20 | 2.84  |
| 44. BD ( 1) C 2- N 16 | 66. BD*( 1) C 1- H 6   | 2.02  |
| 44. BD ( 1) C 2- N 16 | 67. BD*( 1) C 1- N 16  | 0.97  |
| 44. BD ( 1) C 2- N 16 | 69. BD*( 1) C 2- C 3   | 1.36  |
| 44. BD ( 1) C 2- N 16 | 70. BD*( 1) C 2- C 7   | 1.21  |
| 44. BD ( 1) C 2- N 16 | 74. BD*( 1) C 3- C 8   | 1.63  |
| 44. BD ( 1) C 2- N 16 | 80. BD*( 1) C 7- C 12  | 0.97  |
| 45. BD ( 1) C 3- C 4  | 69. BD*( 1) C 2- C 3   | 1.80  |
| 45. BD ( 1) C 3- C 4  | 70. BD*( 1) C 2- C 7   | 2.40  |
| 45. BD ( 1) C 3- C 4  | 74. BD*( 1) C 3- C 8   | 2.11  |
| 45. BD ( 1) C 3- C 4  | 76. BD*( 1) C 4- C 5   | 1.43  |
| 45. BD ( 1) C 3- C 4  | 78. BD*( 1) C 4- H 9   | 0.50  |
| 45. BD ( 1) C 3- C 4  | 79. BD*( 1) C 5- H 10  | 2.46  |
| 45. BD ( 1) C 3- C 4  | 82. BD*( 1) C 8- C 11  | 1.76  |
| 46. BD ( 1) C 3- C 8  | 69. BD*( 1) C 2- C 3   | 2.03  |
| 46. BD ( 1) C 3- C 8  | 72. BD*( 1) C 2- N 16  | 3.48  |
| 46. BD ( 1) C 3- C 8  | 73. BD*( 1) C 3- C 4   | 2.01  |
| 46. BD ( 1) C 3- C 8  | 76. BD*( 1) C 4- C 5   | 1.69  |
| 46. BD ( 1) C 3- C 8  | 82. BD*( 1) C 8- C 11  | 1.54  |
| 46. BD ( 1) C 3- C 8  | 86. BD*( 1) C 11- H 14 | 2.34  |
| 47. BD ( 2) C 3- C 8  | 71. BD*( 2) C 2- C 7   | 4.21  |
| 47. BD ( 2) C 3- C 8  | 77. BD*( 2) C 4- C 5   | 19.21 |
| 47. BD ( 2) C 3- C 8  | 85. BD*( 2) C 11- C 12 | 16.81 |
| 48. BD ( 1) C 4- C 5  | 65. BD*( 1) C 1- C 5   | 1.32  |
| 48. BD ( 1) C 4- C 5  | 66. BD*( 1) C 1- H 6   | 1.94  |
| 48. BD ( 1) C 4- C 5  | 73. BD*( 1) C 3- C 4   | 1.47  |
| 48. BD ( 1) C 4- C 5  | 74. BD*( 1) C 3- C 8   | 3.01  |
| 48. BD ( 1) C 4- C 5  | 78. BD*( 1) C 4- H 9   | 0.74  |
| 48. BD ( 1) C 4- C 5  | 79. BD*( 1) C 5- H 10  | 0.83  |
| 49. BD ( 2) C 4- C 5  | 68. BD*( 2) C 1- N 16  | 23.05 |
| 49. BD ( 2) C 4- C 5  | 75. BD*( 2) C 3- C 8   | 15.47 |
| 50. BD ( 1) C 4- H 9  | 65. BD*( 1) C 1- C 5   | 3.44  |
| 51. BD ( 1) C 5- H 10 | 67. BD*( 1) C 1- N 16  | 4.67  |
| 51. BD ( 1) C 5- H 10 | 73. BD*( 1) C 3- C 4   | 3.63  |
| 51. BD ( 1) C 5- H 10 | 93. RY ( 1) C 1        | 0.69  |
| 52. BD ( 1) C 7- C 12 | 70. BD*( 1) C 2- C 7   | 1.14  |
| 52. BD ( 1) C 7- C 12 | 72. BD*( 1) C 2- N 16  | 4.31  |
| 52. BD ( 1) C 7- C 12 | 81. BD*( 1) C 7- C 18  | 1.05  |
| 52. BD ( 1) C 7- C 12 | 84. BD*( 1) C 11- C 12 | 1.80  |
| 52. BD ( 1) C 7- C 12 | 86. BD*( 1) C 11- H 14 | 1.91  |
| 52. BD ( 1) C 7- C 12 | 7. BD*( 1) C 12- H 15  | 0.86  |
| 52. BD ( 1) C 7- C 12 | 90. BD*( 1) C 18- H 19 | 0.65  |
| 53. BD ( 1) C 7- C 18 | 69. BD*( 1) C 2- C 3   | 3.39  |
| 53. BD ( 1) C 7- C 18 | 70. BD*( 1) C 2- C 7   | 0.68  |
| 53. BD ( 1) C 7- C 18 | 80. BD*( 1) C 7- C 12  | 1.36  |
| 53. BD ( 1) C 7- C 18 | 84. BD*( 1) C 11- C 12 | 3.13  |

|                        |                        |       |
|------------------------|------------------------|-------|
| 54. BD ( 1) C 8- C 11  | 73. BD*( 1) C 3- C 4   | 2.98  |
| 54. BD ( 1) C 8- C 11  | 74. BD*( 1) C 3- C 8   | 1.58  |
| 54. BD ( 1) C 8- C 11  | 83. BD*( 1) C 8- H 13  | 0.85  |
| 54. BD ( 1) C 8- C 11  | 84. BD*( 1) C 11- C 12 | 1.36  |
| 54. BD ( 1) C 8- C 11  | 86. BD*( 1) C 11- H 14 | 0.77  |
| 54. BD ( 1) C 8- C 11  | 87. BD*( 1) C 12- H 15 | 2.03  |
| 55. BD ( 1) C 8- H 13  | 69. BD*( 1) C 2- C 3   | 3.95  |
| 55. BD ( 1) C 8- H 13  | 84. BD*( 1) C 11- C 12 | 3.64  |
| 56. BD ( 1) C 11- C 12 | 80. BD*( 1) C 7- C 12  | 1.52  |
| 56. BD ( 1) C 11- C 12 | 81. BD*( 1) C 7- C 18  | 2.99  |
| 56. BD ( 1) C 11- C 12 | 82. BD*( 1) C 8- C 11  | 1.48  |
| 56. BD ( 1) C 11- C 12 | 83. BD*( 1) C 8- H 13  | 2.51  |
| 56. BD ( 1) C 11- C 12 | 87. BD*( 1) C 12- H 15 | 0.54  |
| 57. BD ( 2) C 11- C 12 | 71. BD*( 2) C 2- C 7   | 14.66 |
| 57. BD ( 2) C 11- C 12 | 75. BD*( 2) C 3- C 8   | 15.94 |
| 58. BD ( 1) C 11- H 14 | 74. BD*( 1) C 3- C 8   | 3.81  |
| 58. BD ( 1) C 11- H 14 | 80. BD*( 1) C 7- C 12  | 3.27  |
| 59. BD ( 1) C 12- H 15 | 70. BD*( 1) C 2- C 7   | 3.68  |
| 59. BD ( 1) C 12- H 15 | 82. BD*( 1) C 8- C 11  | 3.36  |
| 62. BD ( 1) C 18- H 19 | 71. BD*( 2) C 2- C 7   | 2.54  |
| 62. BD ( 1) C 18- H 19 | 80. BD*( 1) C 7- C 12  | 1.12  |
| 63. BD ( 1) C 18- H 20 | 71. BD*( 2) C 2- C 7   | 3.67  |
| 63. BD ( 1) C 18- H 20 | 80. BD*( 1) C 7- C 12  | 0.82  |
| 64. BD ( 1) C 18- H 21 | 70. BD*( 1) C 2- C 7   | 3.42  |
| 26. LP ( 1) N 16       | 88. BD*( 1)Pd 17-Cl 22 | 25.53 |
| 37. BD ( 1) C 1- C 5   | 88. BD*( 1)Pd 17-Cl 22 | 0.16  |
| 37. BD ( 1) C 1- C 5   | 89. BD*( 1)Pd 17-Cl 23 | 0.30  |
| 39. BD ( 1) C 1- N 16  | 88. BD*( 1)Pd 17-Cl 22 | 0.07  |
| 39. BD ( 1) C 1- N 16  | 89. BD*( 1)Pd 17-Cl 23 | 0.66  |
| 41. BD ( 1) C 2- C 3   | 88. BD*( 1)Pd 17-Cl 22 | 0.84  |
| 41. BD ( 1) C 2- C 3   | 89. BD*( 1)Pd 17-Cl 23 | 1.13  |
| 44. BD ( 1) C 2- N 16  | 88. BD*( 1)Pd 17-Cl 22 | 0.55  |
| 44. BD ( 1) C 2- N 16  | 89. BD*( 1)Pd 17-Cl 23 | 2.37  |
| 52. BD ( 1) C 7- C 12  | 88. BD*( 1)Pd 17-Cl 22 | 0.50  |
| 52. BD ( 1) C 7- C 12  | 89. BD*( 1)Pd 17-Cl 23 | 0.44  |
| 53. BD ( 1) C 7- C 18  | 88. BD*( 1)Pd 17-Cl 22 | 0.50  |
| 53. BD ( 1) C 7- C 18  | 89. BD*( 1)Pd 17-Cl 23 | 0.20  |
| 62. BD ( 1) C 18- H 19 | 88. BD*( 1)Pd 17-Cl 22 | 43.98 |
| 62. BD ( 1) C 18- H 19 | 89. BD*( 1)Pd 17-Cl 23 | 9.05  |
| 63. BD ( 1) C 18- H 20 | 88. BD*( 1)Pd 17-Cl 22 | 16.63 |
| 63. BD ( 1) C 18- H 20 | 89. BD*( 1)Pd 17-Cl 23 | 3.71  |
| 64. BD ( 1) C 18- H 21 | 88. BD*( 1)Pd 17-Cl 22 | 1.46  |
| 64. BD ( 1) C 18- H 21 | 89. BD*( 1)Pd 17-Cl 23 | 0.40  |
| 27. LP ( 1)Pd 17       | 65. BD*( 1) C 1- C 5   | 0.07  |
| 27. LP ( 1)Pd 17       | 67. BD*( 1) C 1- N 16  | 0.60  |
| 27. LP ( 1)Pd 17       | 72. BD*( 1) C 2- N 16  | 0.83  |
| 27. LP ( 1)Pd 17       | 80. BD*( 1) C 7- C 12  | 0.35  |
| 27. LP ( 1)Pd 17       | 81. BD*( 1) C 7- C 18  | 0.17  |
| 27. LP ( 1)Pd 17       | 90. BD*( 1) C 18- H 19 | 0.36  |
| 27. LP ( 1)Pd 17       | 91. BD*( 1) C 18- H 20 | 0.10  |
| 27. LP ( 1)Pd 17       | 92. BD*( 1) C 18- H 21 | 0.92  |
| 28. LP ( 2)Pd 17       | 67. BD*( 1) C 1- N 16  | 0.10  |
| 28. LP ( 2)Pd 17       | 69. BD*( 1) C 2- C 3   | 0.18  |
| 28. LP ( 2)Pd 17       | 72. BD*( 1) C 2- N 16  | 0.06  |
| 28. LP ( 2)Pd 17       | 81. BD*( 1) C 7- C 18  | 0.17  |
| 28. LP ( 2)Pd 17       | 90. BD*( 1) C 18- H 19 | 0.27  |
| 29. LP ( 3)Pd 17       | 68. BD*( 2) C 1- N 16  | 0.20  |

\*

|                        |                        |       |
|------------------------|------------------------|-------|
| 29. LP ( 3)Pd 17       | 90. BD*( 1) C 18- H 19 | 5.96  |
| 29. LP ( 3)Pd 17       | 91. BD*( 1) C 18- H 20 | 0.09  |
| 29. LP ( 3)Pd 17       | 92. BD*( 1) C 18- H 21 | 0.09  |
| 30. LP ( 4)Pd 17       | 68. BD*( 2) C 1- N 16  | 4.04  |
| 30. LP ( 4)Pd 17       | 71. BD*( 2) C 2- C 7   | 0.09  |
| 30. LP ( 4)Pd 17       | 90. BD*( 1) C 18- H 19 | 0.43  |
| 31. LP ( 1)Cl 22       | 90. BD*( 1) C 18- H 19 | 0.13  |
| 31. LP ( 1)Cl 22       | 92. BD*( 1) C 18- H 21 | 0.20  |
| 32. LP ( 2)Cl 22       | 90. BD*( 1) C 18- H 19 | 0.23  |
| 33. LP ( 3)Cl 22       | 65. BD*( 1) C 1- C 5   | 0.37  |
| 33. LP ( 3)Cl 22       | 66. BD*( 1) C 1- H 6   | 4.64  |
| 33. LP ( 3)Cl 22       | 2. BD*( 1) C 2- N 16   | 0.13  |
| 33. LP ( 3)Cl 22       | 90. BD*( 1) C 18- H 19 | 0.12  |
| 34. LP ( 1)Cl 23       | 81. BD*( 1) C 7- C 18  | 0.10  |
| 34. LP ( 1)Cl 23       | 90. BD*( 1) C 18- H 19 | 0.13  |
| 34. LP ( 1)Cl 23       | 92. BD*( 1) C 18- H 21 | 0.06  |
| 35. LP ( 2)Cl 23       | 66. BD*( 1) C 1- H 6   | 0.05  |
| 35. LP ( 2)Cl 23       | 81. BD*( 1) C 7- C 18  | 0.08  |
| 35. LP ( 2)Cl 23       | 90. BD*( 1) C 18- H 19 | 0.06  |
| 35. LP ( 2)Cl 23       | 92. BD*( 1) C 18- H 21 | 0.06  |
| 36. LP ( 3)Cl 23       | 68. BD*( 2) C 1- N 16  | 0.06  |
| 36. LP ( 3)Cl 23       | 90. BD*( 1) C 18- H 19 | 0.24  |
| 36. LP ( 3)Cl 23       | 91. BD*( 1) C 18- H 20 | 0.09  |
| 60. BD ( 1)Pd 17-Cl 22 | 65. BD*( 1) C 1- C 5   | 0.12  |
| 60. BD ( 1)Pd 17-Cl 22 | 66. BD*( 1) C 1- H 6   | 0.33  |
| 60. BD ( 1)Pd 17-Cl 22 | 67. BD*( 1) C 1- N 16  | 0.06  |
| 60. BD ( 1)Pd 17-Cl 22 | 69. BD*( 1) C 2- C 3   | 0.14  |
| 60. BD ( 1)Pd 17-Cl 22 | 72. BD*( 1) C 2- N 16  | 0.10  |
| 60. BD ( 1)Pd 17-Cl 22 | 80. BD*( 1) C 7- C 12  | 0.12  |
| 60. BD ( 1)Pd 17-Cl 22 | 90. BD*( 1) C 18- H 19 | 1.01  |
| 60. BD ( 1)Pd 17-Cl 22 | 91. BD*( 1) C 18- H 20 | 0.07  |
| 60. BD ( 1)Pd 17-Cl 22 | 92. BD*( 1) C 18- H 21 | 0.86  |
| 61. BD ( 1)Pd 17-Cl 23 | 66. BD*( 1) C 1- H 6   | 0.21  |
| 61. BD ( 1)Pd 17-Cl 23 | 69. BD*( 1) C 2- C 3   | 0.07  |
| 61. BD ( 1)Pd 17-Cl 23 | 81. BD*( 1) C 7- C 18  | 0.24  |
| 61. BD ( 1)Pd 17-Cl 23 | 90. BD*( 1) C 18- H 19 | 1.01  |
| 61. BD ( 1)Pd 17-Cl 23 | 91. BD*( 1) C 18- H 20 | 0.13  |
| 61. BD ( 1)Pd 17-Cl 23 | 92. BD*( 1) C 18- H 21 | 0.38  |
| 27. LP ( 1)Pd 17       | 88. BD*( 1)Pd 17-Cl 22 | 8.59  |
| 27. LP ( 1)Pd 17       | 89. BD*( 1)Pd 17-Cl 23 | 7.35  |
| 28. LP ( 2)Pd 17       | 88. BD*( 1)Pd 17-Cl 22 | 7.31  |
| 28. LP ( 2)Pd 17       | 89. BD*( 1)Pd 17-Cl 23 | 7.39  |
| 29. LP ( 3)Pd 17       | 88. BD*( 1)Pd 17-Cl 22 | 0.98  |
| 29. LP ( 3)Pd 17       | 89. BD*( 1)Pd 17-Cl 23 | 1.11  |
| 31. LP ( 1)Cl 22       | 88. BD*( 1)Pd 17-Cl 22 | 3.53  |
| 31. LP ( 1)Cl 22       | 89. BD*( 1)Pd 17-Cl 23 | 3.73  |
| 33. LP ( 3)Cl 22       | 88. BD*( 1)Pd 17-Cl 22 | 2.29  |
| 33. LP ( 3)Cl 22       | 89. BD*( 1)Pd 17-Cl 23 | 2.61  |
| 34. LP ( 1)Cl 23       | 88. BD*( 1)Pd 17-Cl 22 | 1.36  |
| 34. LP ( 1)Cl 23       | 89. BD*( 1)Pd 17-Cl 23 | 0.98  |
| 35. LP ( 2)Cl 23       | 88. BD*( 1)Pd 17-Cl 22 | 5.63  |
| 35. LP ( 2)Cl 23       | 89. BD*( 1)Pd 17-Cl 23 | 4.16  |
| 60. BD ( 1)Pd 17-Cl 22 | 88. BD*( 1)Pd 17-Cl 22 | 14.64 |
| 60. BD ( 1)Pd 17-Cl 22 | 89. BD*( 1)Pd 17-Cl 23 | 39.44 |
| 61. BD ( 1)Pd 17-Cl 23 | 88. BD*( 1)Pd 17-Cl 22 | 26.41 |
| 61. BD ( 1)Pd 17-Cl 23 | 89. BD*( 1)Pd 17-Cl 23 | 5.99  |

**Complex (Cl<sup>1</sup> replaced by CH<sub>3</sub>): [PdCl(CH<sub>3</sub>)(1-tetralone oxime)].**

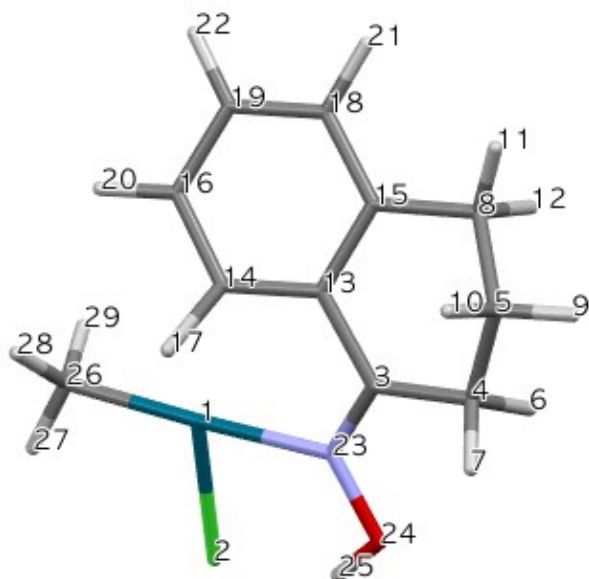

**Donor (L) NBO**

|                      |
|----------------------|
| 24. LP ( 2)Pd 1      |
| 25. LP ( 3)Pd 1      |
| 25. LP ( 3)Pd 1      |
| 33. BD ( 1)Pd 1-Cl 2 |
| 33. BD ( 1)Pd 1-Cl 2 |
| 23. LP ( 1)Pd 1      |
| 23. LP ( 1)Pd 1      |
| 24. LP ( 2)Pd 1      |
| 25. LP ( 3)Pd 1      |
| 26. LP ( 4)Pd 1      |
| 27. LP ( 1)Cl 2      |
| 28. LP ( 2)Cl 2      |
| 28. LP ( 2)Cl 2      |
| 29. LP ( 3)Cl 2      |
| 33. BD ( 1)Pd 1-Cl 2 |
| 33. BD ( 1)Pd 1-Cl 2 |
| 33. BD ( 1)Pd 1-Cl 2 |
| 33. BD ( 1)Pd 1-Cl 2 |

**Acceptor (NL) NBO**

|                        |
|------------------------|
| 96. BD*( 1) C 26- H 27 |
| 97. BD*( 1) C 26- H 28 |
| 98. BD*( 1) C 26- H 29 |
| 67. BD*( 1)Pd 1- C 26  |
| 97. BD*( 1) C 26- H 28 |
| 81. BD*( 1) C 13- C 14 |
| 82. BD*( 2) C 13- C 14 |
| 70. BD*( 1) C 3- N 23  |
| 71. BD*( 2) C 3- N 23  |
| 81. BD*( 1) C 13- C 14 |
| 83. BD*( 1) C 13- C 15 |
| 84. BD*( 1) C 14- C 16 |
| 94. BD*( 1) N 23- O 24 |
| 71. BD*( 2) C 3- N 23  |
| 81. BD*( 1) C 13- C 14 |
| 84. BD*( 1) C 14- C 16 |
| 85. BD*( 1) C 14- H 17 |
| 94. BD*( 1) N 23- O 24 |
| 71. BD*( 2) C 3- N 23  |
| 82. BD*( 2) C 13- C 14 |
| 84. BD*( 1) C 14- C 16 |
| 85. BD*( 1) C 14- H 17 |
| 82. BD*( 2) C 13- C 14 |
| 71. BD*( 2) C 3- N 23  |
| 85. BD*( 1) C 14- H 17 |
| 70. BD*( 1) C 3- N 23  |
| 82. BD*( 2) C 13- C 14 |
| 94. BD*( 1) N 23- O 24 |
| 95. BD*( 1) O 24- H 25 |
| 81. BD*( 1) C 13- C 14 |
| 82. BD*( 2) C 13- C 14 |
| 84. BD*( 1) C 14- C 16 |
| 85. BD*( 1) C 14- H 17 |

**E (2) kcalmol<sup>-1</sup>**

|       |
|-------|
| 1.24  |
| 0.70  |
| 0.79  |
| 44.68 |
| 0.68  |
| 0.20  |
| 2.29  |
| 0.65  |
| 0.17  |
| 0.55  |
| 0.08  |
| 0.83  |
| 1.77  |
| 3.32  |
| 0.09  |
| 0.05  |
| 1.51  |
| 0.06  |
| 0.43  |
| 0.93  |
| 0.06  |
| 7.18  |
| 0.32  |
| 0.08  |
| 0.20  |
| 0.20  |
| 0.20  |
| 0.30  |
| 0.07  |
| 9.77  |
| 0.11  |
| 3.19  |
| 0.36  |
| 0.09  |

|                        |                        |       |
|------------------------|------------------------|-------|
| 33. BD ( 1)Pd 1-Cl 2   | 90. BD*( 1) C 16- H 20 | 0.06  |
| 33. BD ( 1)Pd 1-Cl 2   | 94. BD*( 1) N 23- O 24 | 0.21  |
| 33. BD ( 1)Pd 1-Cl 2   | 95. BD*( 1) O 24- H 25 | 0.73  |
| 34. BD ( 1)Pd 1- C 26  | 70. BD*( 1) C 3- N 23  | 0.10  |
| 34. BD ( 1)Pd 1- C 26  | 82. BD*( 2) C 13- C 14 | 4.45  |
| 34. BD ( 1)Pd 1- C 26  | 84. BD*( 1) C 14- C 16 | 0.26  |
| 34. BD ( 1)Pd 1- C 26  | 85. BD*( 1) C 14- H 17 | 0.40  |
| 34. BD ( 1)Pd 1- C 26  | 94. BD*( 1) N 23- O 24 | 0.89  |
| 34. BD ( 1)Pd 1- C 26  | 95. BD*( 1) O 24- H 25 | 0.37  |
| 63. BD ( 1) C 26- H 27 | 90. BD*( 1) C 16- H 20 | 0.05  |
| 64. BD ( 1) C 26- H 28 | 81. BD*( 1) C 13- C 14 | 0.05  |
| 64. BD ( 1) C 26- H 28 | 85. BD*( 1) C 14- H 17 | 0.11  |
| 64. BD ( 1) C 26- H 28 | 90. BD*( 1) C 16- H 20 | 0.10  |
| 30. LP ( 1) N 23       | 66. BD*( 1)Pd 1-Cl 2   | 18.97 |
| 30. LP ( 1) N 23       | 67. BD*( 1)Pd 1- C 26  | 76.47 |
| 31. LP ( 1) O 24       | 66. BD*( 1)Pd 1-Cl 2   | 0.13  |
| 31. LP ( 1) O 24       | 67. BD*( 1)Pd 1- C 26  | 0.19  |
| 35. BD ( 1) C 3- C 4   | 66. BD*( 1)Pd 1-Cl 2   | 0.61  |
| 35. BD ( 1) C 3- C 4   | 67. BD*( 1)Pd 1- C 26  | 0.71  |
| 36. BD ( 1) C 3- C 13  | 66. BD*( 1)Pd 1-Cl 2   | 0.37  |
| 36. BD ( 1) C 3- C 13  | 67. BD*( 1)Pd 1- C 26  | 0.13  |
| 37. BD ( 1) C 3- N 23  | 66. BD*( 1)Pd 1-Cl 2   | 1.29  |
| 37. BD ( 1) C 3- N 23  | 67. BD*( 1)Pd 1- C 26  | 3.23  |
| 48. BD ( 1) C 13- C 14 | 66. BD*( 1)Pd 1-Cl 2   | 0.64  |
| 48. BD ( 1) C 13- C 14 | 67. BD*( 1)Pd 1- C 26  | 0.10  |
| 49. BD ( 2) C 13- C 14 | 66. BD*( 1)Pd 1-Cl 2   | 22.61 |
| 49. BD ( 2) C 13- C 14 | 67. BD*( 1)Pd 1- C 26  | 6.05  |
| 49. BD ( 2) C 13- C 14 | 98. BD*( 1) C 26- H 29 | 0.06  |
| 50. BD ( 1) C 13- C 15 | 66. BD*( 1)Pd 1-Cl 2   | 0.12  |
| 50. BD ( 1) C 13- C 15 | 67. BD*( 1)Pd 1- C 26  | 0.06  |
| 51. BD ( 1) C 14- C 16 | 66. BD*( 1)Pd 1-Cl 2   | 0.15  |
| 51. BD ( 1) C 14- C 16 | 67. BD*( 1)Pd 1- C 26  | 0.31  |
| 52. BD ( 1) C 14- H 17 | 66. BD*( 1)Pd 1-Cl 2   | 73.83 |
| 52. BD ( 1) C 14- H 17 | 67. BD*( 1)Pd 1- C 26  | 8.56  |
| 52. BD ( 1) C 14- H 17 | 97. BD*( 1) C 26- H 28 | 0.15  |
| 55. BD ( 1) C 16- C 19 | 66. BD*( 1)Pd 1-Cl 2   | 0.54  |
| 55. BD ( 1) C 16- C 19 | 67. BD*( 1)Pd 1- C 26  | 0.24  |
| 56. BD ( 2) C 16- C 19 | 66. BD*( 1)Pd 1-Cl 2   | 0.26  |
| 56. BD ( 2) C 16- C 19 | 67. BD*( 1)Pd 1- C 26  | 0.14  |
| 61. BD ( 1) N 23- O 24 | 66. BD*( 1)Pd 1-Cl 2   | 0.26  |
| 30. LP ( 1) N 23       | 68. BD*( 1) C 3- C 4   | 8.74  |
| 30. LP ( 1) N 23       | 69. BD*( 1) C 3- C 13  | 1.54  |
| 30. LP ( 1) N 23       | 95. BD*( 1) O 24- H 25 | 0.88  |
| 32. LP ( 2) O 24       | 71. BD*( 2) C 3- N 23  | 19.72 |
| 35. BD ( 1) C 3- C 4   | 69. BD*( 1) C 3- C 13  | 0.96  |
| 35. BD ( 1) C 3- C 4   | 70. BD*( 1) C 3- N 23  | 0.73  |
| 35. BD ( 1) C 3- C 4   | 76. BD*( 1) C 5- H 9   | 1.32  |
| 35. BD ( 1) C 3- C 4   | 81. BD*( 1) C 13- C 14 | 2.43  |
| 35. BD ( 1) C 3- C 4   | 94. BD*( 1) N 23- O 24 | 1.00  |
| 36. BD ( 1) C 3- C 13  | 68. BD*( 1) C 3- C 4   | 0.66  |
| 36. BD ( 1) C 3- C 13  | 70. BD*( 1) C 3- N 23  | 1.39  |
| 36. BD ( 1) C 3- C 13  | 74. BD*( 1) C 4- H 7   | 0.51  |
| 36. BD ( 1) C 3- C 13  | 81. BD*( 1) C 13- C 14 | 1.80  |
| 36. BD ( 1) C 3- C 13  | 83. BD*( 1) C 13- C 15 | 1.55  |
| 36. BD ( 1) C 3- C 13  | 84. BD*( 1) C 14- C 16 | 1.64  |
| 36. BD ( 1) C 3- C 13  | 86. BD*( 1) C 15- C 18 | 2.54  |
| 36. BD ( 1) C 3- C 13  | 94. BD*( 1) N 23- O 24 | 6.16  |
| 37. BD ( 1) C 3- N 23  | 68. BD*( 1) C 3- C 4   | 1.29  |



|                        |                        |       |
|------------------------|------------------------|-------|
| 37. BD ( 1) C 3- N 23  | 69. BD*( 1) C 3- C 13  | 1.18  |
| 37. BD ( 1) C 3- N 23  | 72. BD*( 1) C 4- C 5   | 0.58  |
| 37. BD ( 1) C 3- N 23  | 83. BD*( 1) C 13- C 15 | 1.73  |
| 37. BD ( 1) C 3- N 23  | 95. BD*( 1) O 24- H 25 | 0.91  |
| 38. BD ( 2) C 3- N 23  | 71. BD*( 2) C 3- N 23  | 2.11  |
| 38. BD ( 2) C 3- N 23  | 73. BD*( 1) C 4- H 6   | 1.57  |
| 38. BD ( 2) C 3- N 23  | 74. BD*( 1) C 4- H 7   | 1.07  |
| 38. BD ( 2) C 3- N 23  | 82. BD*( 2) C 13- C 14 | 8.01  |
| 39. BD ( 1) C 4- C 5   | 68. BD*( 1) C 3- C 4   | 0.67  |
| 39. BD ( 1) C 4- C 5   | 70. BD*( 1) C 3- N 23  | 3.83  |
| 39. BD ( 1) C 4- C 5   | 78. BD*( 1) C 8- H 11  | 1.68  |
| 40. BD ( 1) C 4- H 6   | 69. BD*( 1) C 3- C 13  | 1.38  |
| 40. BD ( 1) C 4- H 6   | 71. BD*( 2) C 3- N 23  | 6.14  |
| 40. BD ( 1) C 4- H 6   | 77. BD*( 1) C 5- H 10  | 2.50  |
| 41. BD ( 1) C 4- H 7   | 69. BD*( 1) C 3- C 13  | 2.49  |
| 41. BD ( 1) C 4- H 7   | 71. BD*( 2) C 3- N 23  | 3.77  |
| 41. BD ( 1) C 4- H 7   | 75. BD*( 1) C 5- C 8   | 2.73  |
| 42. BD ( 1) C 5- C 8   | 74. BD*( 1) C 4- H 7   | 1.69  |
| 42. BD ( 1) C 5- C 8   | 80. BD*( 1) C 8- C 15  | 0.65  |
| 42. BD ( 1) C 5- C 8   | 86. BD*( 1) C 15- C 18 | 2.61  |
| 42. BD ( 1) C 5- C 8   | 87. BD*( 2) C 15- C 18 | 0.83  |
| 43. BD ( 1) C 5- H 9   | 68. BD*( 1) C 3- C 4   | 2.82  |
| 43. BD ( 1) C 5- H 9   | 80. BD*( 1) C 8- C 15  | 2.81  |
| 44. BD ( 1) C 5- H 10  | 73. BD*( 1) C 4- H 6   | 2.61  |
| 44. BD ( 1) C 5- H 10  | 79. BD*( 1) C 8- H 12  | 2.72  |
| 45. BD ( 1) C 8- H 11  | 72. BD*( 1) C 4- C 5   | 2.78  |
| 45. BD ( 1) C 8- H 11  | 83. BD*( 1) C 13- C 15 | 3.35  |
| 45. BD ( 1) C 8- H 11  | 87. BD*( 2) C 15- C 18 | 1.06  |
| 46. BD ( 1) C 8- H 12  | 77. BD*( 1) C 5- H 10  | 2.61  |
| 46. BD ( 1) C 8- H 12  | 87. BD*( 2) C 15- C 18 | 5.10  |
| 47. BD ( 1) C 8- C 15  | 76. BD*( 1) C 5- H 9   | 1.39  |
| 47. BD ( 1) C 8- C 15  | 81. BD*( 1) C 13- C 14 | 3.22  |
| 47. BD ( 1) C 8- C 15  | 83. BD*( 1) C 13- C 15 | 1.15  |
| 47. BD ( 1) C 8- C 15  | 86. BD*( 1) C 15- C 18 | 1.35  |
| 47. BD ( 1) C 8- C 15  | 91. BD*( 1) C 18- C 19 | 2.24  |
| 48. BD ( 1) C 13- C 14 | 68. BD*( 1) C 3- C 4   | 2.30  |
| 48. BD ( 1) C 13- C 14 | 69. BD*( 1) C 3- C 13  | 2.10  |
| 48. BD ( 1) C 13- C 14 | 80. BD*( 1) C 8- C 15  | 2.77  |
| 48. BD ( 1) C 13- C 14 | 83. BD*( 1) C 13- C 15 | 2.86  |
| 48. BD ( 1) C 13- C 14 | 84. BD*( 1) C 14- C 16 | 1.69  |
| 48. BD ( 1) C 13- C 14 | 90. BD*( 1) C 16- H 20 | 1.99  |
| 49. BD ( 2) C 13- C 14 | 70. BD*( 1) C 3- N 23  | 0.67  |
| 49. BD ( 2) C 13- C 14 | 71. BD*( 2) C 3- N 23  | 15.93 |
| 49. BD ( 2) C 13- C 14 | 85. BD*( 1) C 14- H 17 | 2.28  |
| 49. BD ( 2) C 13- C 14 | 87. BD*( 2) C 15- C 18 | 14.92 |
| 49. BD ( 2) C 13- C 14 | 89. BD*( 2) C 16- C 19 | 17.75 |
| 50. BD ( 1) C 13- C 15 | 69. BD*( 1) C 3- C 13  | 1.84  |
| 50. BD ( 1) C 13- C 15 | 70. BD*( 1) C 3- N 23  | 1.43  |
| 50. BD ( 1) C 13- C 15 | 78. BD*( 1) C 8- H 11  | 0.65  |
| 50. BD ( 1) C 13- C 15 | 80. BD*( 1) C 8- C 15  | 0.98  |
| 50. BD ( 1) C 13- C 15 | 81. BD*( 1) C 13- C 14 | 2.49  |
| 50. BD ( 1) C 13- C 15 | 85. BD*( 1) C 14- H 17 | 2.20  |
| 50. BD ( 1) C 13- C 15 | 86. BD*( 1) C 15- C 18 | 1.95  |
| 50. BD ( 1) C 13- C 15 | 92. BD*( 1) C 18- H 21 | 2.04  |
| 51. BD ( 1) C 14- C 16 | 69. BD*( 1) C 3- C 13  | 3.06  |
| 51. BD ( 1) C 14- C 16 | 81. BD*( 1) C 13- C 14 | 1.54  |
| 51. BD ( 1) C 14- C 16 | 88. BD*( 1) C 16- C 19 | 1.48  |
| 51. BD ( 1) C 14- C 16 | 90. BD*( 1) C 16- H 20 | 1.04  |

|                        |                        |       |
|------------------------|------------------------|-------|
| 51. BD ( 1) C 14- C 16 | 93. BD*( 1) C 19- H 22 | 2.19  |
| 52. BD ( 1) C 14- H 17 | 82. BD*( 2) C 13- C 14 | 1.31  |
| 52. BD ( 1) C 14- H 17 | 83. BD*( 1) C 13- C 15 | 4.58  |
| 52. BD ( 1) C 14- H 17 | 88. BD*( 1) C 16- C 19 | 4.61  |
| 52. BD ( 1) C 14- H 17 | 90. BD*( 1) C 16- H 20 | 0.63  |
| 53. BD ( 1) C 15- C 18 | 69. BD*( 1) C 3- C 13  | 2.71  |
| 53. BD ( 1) C 15- C 18 | 75. BD*( 1) C 5- C 8   | 0.81  |
| 53. BD ( 1) C 15- C 18 | 80. BD*( 1) C 8- C 15  | 1.30  |
| 53. BD ( 1) C 15- C 18 | 83. BD*( 1) C 13- C 15 | 2.23  |
| 53. BD ( 1) C 15- C 18 | 91. BD*( 1) C 18- C 19 | 1.66  |
| 53. BD ( 1) C 15- C 18 | 92. BD*( 1) C 18- H 21 | 0.63  |
| 53. BD ( 1) C 15- C 18 | 93. BD*( 1) C 19- H 22 | 1.90  |
| 54. BD ( 2) C 15- C 18 | 75. BD*( 1) C 5- C 8   | 1.13  |
| 54. BD ( 2) C 15- C 18 | 79. BD*( 1) C 8- H 12  | 3.21  |
| 54. BD ( 2) C 15- C 18 | 82. BD*( 2) C 13- C 14 | 16.13 |
| 54. BD ( 2) C 15- C 18 | 89. BD*( 2) C 16- C 19 | 15.16 |
| 55. BD ( 1) C 16- C 19 | 84. BD*( 1) C 14- C 16 | 1.51  |
| 55. BD ( 1) C 16- C 19 | 85. BD*( 1) C 14- H 17 | 2.35  |
| 55. BD ( 1) C 16- C 19 | 90. BD*( 1) C 16- H 20 | 0.60  |
| 55. BD ( 1) C 16- C 19 | 91. BD*( 1) C 18- C 19 | 1.35  |
| 55. BD ( 1) C 16- C 19 | 92. BD*( 1) C 18- H 21 | 2.16  |
| 55. BD ( 1) C 16- C 19 | 93. BD*( 1) C 19- H 22 | 0.57  |
| 56. BD ( 2) C 16- C 19 | 82. BD*( 2) C 13- C 14 | 12.83 |
| 56. BD ( 2) C 16- C 19 | 87. BD*( 2) C 15- C 18 | 14.86 |
| 57. BD ( 1) C 16- H 20 | 81. BD*( 1) C 13- C 14 | 3.32  |
| 57. BD ( 1) C 16- H 20 | 91. BD*( 1) C 18- C 19 | 3.48  |
| 58. BD ( 1) C 18- C 19 | 80. BD*( 1) C 8- C 15  | 3.23  |
| 58. BD ( 1) C 18- C 19 | 86. BD*( 1) C 15- C 18 | 1.75  |
| 58. BD ( 1) C 18- C 19 | 88. BD*( 1) C 16- C 19 | 1.29  |
| 58. BD ( 1) C 18- C 19 | 90. BD*( 1) C 16- H 20 | 2.22  |
| 58. BD ( 1) C 18- C 19 | 92. BD*( 1) C 18- H 21 | 0.61  |
| 58. BD ( 1) C 18- C 19 | 93. BD*( 1) C 19- H 22 | 0.63  |
| 59. BD ( 1) C 18- H 21 | 83. BD*( 1) C 13- C 15 | 4.22  |
| 59. BD ( 1) C 18- H 21 | 88. BD*( 1) C 16- C 19 | 3.53  |
| 60. BD ( 1) C 19- H 22 | 84. BD*( 1) C 14- C 16 | 3.64  |
| 60. BD ( 1) C 19- H 22 | 86. BD*( 1) C 15- C 18 | 3.59  |
| 61. BD ( 1) N 23- O 24 | 69. BD*( 1) C 3- C 13  | 3.20  |

**Supplementary Table 4:** Overlap matrix for complexes (1) to (5) and [PdCl(CH<sub>3</sub>)(1-tetralone oxime)].

|                     |                | (1)    | (2)    | (3)    | (4)    | (5)    | Cl <sup>1</sup> replaced<br>by CH <sub>3</sub> |
|---------------------|----------------|--------|--------|--------|--------|--------|------------------------------------------------|
| C-H $\sigma$        | Pd-Cl* (trans) | 0.4488 | 0.4512 | 0.4287 | -      | 0.4522 | 0.5248                                         |
|                     | Pd-Cl* (cis)   | 0.0788 | 0.0736 | 0.0783 | 0.1072 | 0.0811 | 0.0106 <sup>‡</sup>                            |
| C(7)-C(8) $\pi$     | Pd-Cl* (trans) | 0.1764 | 0.1731 | 0.2050 | -      | -      | 0.1711                                         |
|                     | Pd-Cl* (cis)   | 0.0497 | 0.0502 | 0.0494 | -      | -      | 0.0287 <sup>‡</sup>                            |
| C(8)-C(8a) $\sigma$ | Pd-Cl* (trans) | 0.1651 | 0.1642 | 0.1811 | -      | 0.1749 | 0.2048                                         |
|                     | Pd-Cl* (cis)   | 0.0968 | 0.1004 | 0.1019 | 0.1229 | 0.1069 | 0.0997 <sup>‡</sup>                            |
| C(8)-C(8a) $\pi$    | Pd-Cl* (trans) | -      | -      | -      | -      | 0.1741 | -                                              |
|                     | Pd-Cl* (cis)   | -      | -      | -      | -      | 0.0699 | . <sup>‡</sup>                                 |

<sup>‡</sup> Value is for the Pd-C $\sigma^*$ (cis) orbital for the [PdCl(CH<sub>3</sub>)(1-tetralone oxime)] complex.

**Supplementary Table 5:** Occupancy (n) and Energy (a.u) of NBOs involved in donor-acceptor interactions for complexes (1) to (5) and [PdCl(CH<sub>3</sub>)(1-tetralone oxime)].

|                                      | (1)     | (2)     | (3)     | (4)     | (5)     | Cl <sup>1</sup> replaced by CH <sub>3</sub> |
|--------------------------------------|---------|---------|---------|---------|---------|---------------------------------------------|
| <b>C-H<math>\sigma</math></b>        |         |         |         |         |         |                                             |
| Occupancy (n)                        | 1.8457  | 1.8375  | 1.8511  | 1.9013  | 1.8444  | 1.8406                                      |
| Energy (a.u)                         | -0.4451 | -0.4513 | -0.3212 | -0.3184 | -0.4496 | -0.4155                                     |
| <b>C(7)-C(8)<math>\pi</math></b>     |         |         |         |         |         |                                             |
| Occupancy (n)                        | 1.6494  | 1.6309  | 1.6344  | -       | -       | 1.5985                                      |
| Energy (a.u)                         | -0.2574 | -0.2730 | -0.1227 | -       | -       | -0.2382                                     |
| <b>C(8)-C(8a)<math>\sigma</math></b> |         |         |         |         |         |                                             |
| Occupancy (n)                        | 1.9677  | 1.9626  | 1.9611  | 1.9617  | 1.9671  | 1.9622                                      |
| Energy (a.u)                         | -0.5625 | -0.5832 | -0.4307 | -0.4077 | -0.5666 | -0.5459                                     |
| <b>C(8)-C(8a) <math>\pi</math></b>   |         |         |         |         |         |                                             |
| Occupancy (n)                        | -       | -       | -       | -       | 1.6009  | -                                           |
| Energy (a.u)                         | -       | -       | -       | -       | -0.2613 | -                                           |
| <b>Pd-Cl* (<i>cis</i>)</b>           |         |         |         |         |         |                                             |
| Occupancy (n)                        | 0.3980  | 0.3984  | 0.4181  | 0.3590  | 0.3966  | 0.3090 <sup>‡</sup>                         |
| Energy (a.u)                         | 0.2146  | 0.1761  | 0.3115  | 0.4442  | 0.2001  | 0.2054 <sup>‡</sup>                         |
| <b>Pd-Cl* (<i>trans</i>)</b>         |         |         |         |         |         |                                             |
| Occupancy (n)                        | 0.3208  | 0.3131  | 0.3888  | -       | 0.3215  | 0.3117                                      |
| Energy (a.u)                         | 0.2970  | 0.2607  | 0.3969  | -       | 0.2789  | 0.5630                                      |

<sup>‡</sup> Value is for the Pd-C $\sigma^*$ (*cis*) orbital for the [PdCl(CH<sub>3</sub>)(1-tetralone oxime)] complex.

**Supplementary Table 6.** Selected structural data for (1) to (5) and [PdCl(CH<sub>3</sub>)(1-tetralone oxime)].

|                                  | (1)     | (2)     | (3)     | (4)     | (5)     | Cl <sup>1</sup><br>replaced by<br>CH <sub>3</sub> |
|----------------------------------|---------|---------|---------|---------|---------|---------------------------------------------------|
| <b>Distances (Å)<sup>a</sup></b> |         |         |         |         |         |                                                   |
| Pd····H                          | 1.819   | 1.802   | 1.901   | 2.180   | 1.822   | 1.780                                             |
| Pd····C                          | 2.240   | 2.229   | 2.208   | 2.146   | 2.228   | 2.226                                             |
| Cl(cis)····H                     | 2.865   | 2.850   | 2.957   | 3.235   | 2.887   | 2.720                                             |
| C-H                              | 1.152   | 1.156   | 1.138   | 1.113   | 1.152   | 1.164                                             |
|                                  | (1.081) | (1.089) | (1.090) | (1.090) | (1.090) | (1.081)                                           |
| <b>Angles (°)</b>                |         |         |         |         |         |                                                   |
| Pd-N-C                           | 119.9   | 120.2   | 120.0   | 119.8   | 120.8   | 119.4                                             |
| Pd····C-H                        | 54.0    | 53.7    | 59.4    | 76.8    | 54.6    | 52.7                                              |
| Pd····H-C                        | 95.2    | 95.3    | 89.6    | 73.4    | 94.4    | 96.0                                              |
| Cl(trans)-Pd····H                | 157.7   | 159.0   | 153.4   | 146.3   | 157.2   | 157.5                                             |
| Cl(trans)-Pd····C                | 166.3   | 165.3   | 167.8   | 167.3   | 166.2   | 165.7                                             |
| <b>Dihedrals (°)</b>             |         |         |         |         |         |                                                   |
| Cl(trans)-Pd-N-C                 | 165.8   | 165.5   | 168.3   | 171.4   | 166.3   | 166.3                                             |
| Ar-Plane/CP <sup>b</sup>         | 34.5    | 35.6    | 33.0    | 33.4    | 36.1    | 33.6                                              |
| N-C-C-C                          | 15.1    | 15.1    | 14.0    | 18.5    | 18.0    | 15.4                                              |
| <b>C-H deform (°)</b>            | -27.2   | -27.6   | -31.1   | -43.7   | -27.1   | -26.6                                             |

<sup>a</sup> Free ligand values in brackets. <sup>b</sup> Angle between the aromatic ring plane and the coordination plane.

**Supplementary Table 7.** NBO donations (kcal mol<sup>-1</sup>) for (1) to (5) and [PdCl(CH<sub>3</sub>)(1-tetralone oxime)].

|                         | (1)  | (2)  | (3)  | (4) | (5)  | Cl <sup>1</sup> replaced<br>by CH <sub>3</sub> |
|-------------------------|------|------|------|-----|------|------------------------------------------------|
| <b>C-Hσ to</b>          |      |      |      |     |      |                                                |
| Pd-Clσ*( <i>trans</i> ) | 58.6 | 75.6 | 64.0 | -   | 56.9 | 73.8                                           |
| Pd-Clσ*( <i>cis</i> )   | 10.0 | 15.0 | 13.8 | 3.1 | 8.9  | 8.6 <sup>‡</sup>                               |
| <b>C(7)-C(8)π to</b>    |      |      |      |     |      |                                                |
| Pd-Clσ*( <i>trans</i> ) | 20.3 | 27.6 | 41.9 | -   | 0.1  | 22.6                                           |
| Pd-Clσ*( <i>cis</i> )   | 6.5  | 10.5 | 13.8 | -   | -    | 6.1 <sup>‡</sup>                               |
| <b>C(8)-C(8a)σ to</b>   |      |      |      |     |      |                                                |
| Pd-Clσ*( <i>trans</i> ) | 1.4  | 0.7  | 0.1  | -   | 1.5  | 0.6                                            |
| Pd-Clσ*( <i>cis</i> )   | 0.4  | 0.1  | 0.9  | 1.9 | 0.4  | 0.1 <sup>‡</sup>                               |
| <b>C(8)-C(8a)π to</b>   |      |      |      |     |      |                                                |
| Pd-Clσ*( <i>trans</i> ) | -    | -    | -    | -   | 20.3 | -                                              |
| Pd-Clσ*( <i>cis</i> )   | -    | -    | -    | -   | 6.8  | -                                              |

<sup>‡</sup> Value is for the Pd-Cσ\*(*cis*) orbital for the [PdCl(CH<sub>3</sub>)(1-tetralone oxime)] complex.

## References

---

- <sup>1</sup> S. Grimme, J. Antony, S. Ehrlich, H. Krieg, *J. Chem. Phys.* **2010**, *132*, 154104–154119.
- <sup>2</sup> Gaussian 09, Revision E.01, M. J. Frisch, G. W. Trucks, H. B. Schlegel, G. E. Scuseria, M. A. Robb, J. R. Cheeseman, G. Scalmani, V. Barone, B. Mennucci, G. A. Petersson, H. Nakatsuji, M. Caricato, X. Li, H. P. Hratchian, A. F. Izmaylov, J. Bloino, G. Zheng, J. L. Sonnenberg, M. Hada, M. Ehara, K. Toyota, R. Fukuda, J. Hasegawa, M. Ishida, T. Nakajima, Y. Honda, O. Kitao, H. Nakai, T. Vreven, J. A. Montgomery, Jr., J. E. Peralta, F. Ogliaro, M. Bearpark, J. J. Heyd, E. Brothers, K. N. Kudin, V. N. Staroverov, R. Kobayashi, J. Normand, K. Raghavachari, A. Rendell, J. C. Burant, S. S. Iyengar, J. Tomasi, M. Cossi, N. Rega, J. M. Millam, M. Klene, J. E. Knox, J. B. Cross, V. Bakken, C. Adamo, J. Jaramillo, R. Gomperts, R. E. Stratmann, O. Yazyev, A. J. Austin, R. Cammi, C. Pomelli, J. W. Ochterski, R. L. Martin, K. Morokuma, V. G. Zakrzewski, G. A. Voth, P. Salvador, J. J. Dannenberg, S. Dapprich, A. D. Daniels, Ö. Farkas, J. B. Foresman, J. V. Ortiz, J. Cioslowski, and D. J. Fox, Gaussian, Inc., Wallingford CT, **2009**.
- <sup>3</sup> K. A. Peterson, D. Figgen, M. Dolg, H. Stoll, *J. Chem. Phys.* 2007, *126*, 124101–124112.
- <sup>4</sup> T. H. Dunning Jr., *J. Chem. Phys.* 1989, *90*, 1007–1023.
- <sup>5</sup> AIMAll (version 16.08.17), Todd A. Keith, TK Gristmill Software, Overland Park KS, USA, **2016**, <http://aim.tkgristmill.com>.
- <sup>6</sup> E. D. Glendening, J. K. Badenhoop, A. E. Reed, J. E. Carpenter, J. A. Bohmann, C. M. Morales, C. R. Landis, F. Weinhold, NBO, version 6.0, Theoretical Chemistry Institute, University of Wisconsin, Madison, WI, **2013**; <http://nbo6.chem.wisc.edu/>.
